# Supplementary material for: Epigenetic drift of H3K27me3 in aging links glycolysis to healthy longevity in Drosophila
Source: eLife. 2018 May 29;7:e35368. doi: 10.7554/eLife.35368 (PMC5991832; doi:10.7554/eLife.35368)
Supplement: Supplementary file 1. — Summary of ChIP-seq experiments. Two criteria for peak calling: IP/input ≥ 2, signals spanning ≥3 kb. In total, 222 peak regions of H3K27me3 were reproducibly identified by four biological replicates at 3d. For each peak regions, information pertaining to chromosomal location and genes therein contained were given. ChIP-seq was using muscle tissues of 3d=old animals. Genotype: 5905. [file elife-35368-supp1.xls]

## Sheet: Sheet1
Quantitative ChIP-seq datasets
genotype	development	antibody	catalog number	tissue
WT	embryo	H3K27me3	millipore 07-449	whole embryo
WT	larva	H3K27me3	millipore 07-449	whole larva
WT	pupa	H3K27me3	millipore 07-449	whole pupa	2 biological replicaties
genotype	age	antibody	catalog number	tissue
WT	3d	H3K27me3	millipore 07-449	muscle
WT	15d	H3K27me3	millipore 07-449	muscle
WT	30d	H3K27me3	millipore 07-449	muscle	2 biological replicaties
genotype	age	antibody	catalog number	tissue
WT	3d	H3K27me3	millipore 07-449	head, muscle
WT	30d	H3K27me3	millipore 07-449	head, muscle
Pcl c421/+; Su(z)12 c253/+	3d	H3K27me3	millipore 07-449	head, muscle
Pcl c421/+; Su(z)12 c253/+	30d	H3K27me3	millipore 07-449	head, muscle	2 biological replicaties
genotype	age	antibody	catalog number	tissue
WT	3d	H3K27me3	millipore 07-449	muscle
WT	30d	H3K27me3	millipore 07-449	muscle
esc c289/+; E(z) c239/+	3d	H3K27me3	millipore 07-449	muscle
esc c289/+; E(z) c239/+	30d	H3K27me3	millipore 07-449	muscle	2 biological replicaties
Reproduceable peak number and peak region
development	embryo	peak number	peak coverage
	replicate 1	424	10.29 M
	replicate 2	377	9.33 M
	reproduceable	312	9.92 M
	larva	peak number	peak coverage
	replicate 1	238	6.37 M
	replicate 2	248	6.7 M
	reproduceable	182	6.63 M
	pupa	peak number	peak coverage
	replicate 1	237	7.27 M
	replicate 2	294	8.72 M
	reproduceable	185	8.12 M
WT	Muscle			Head
	3d WT	peak number	peak coverage	3d WT	peak number	peak coverage
	replicate 1	507	9.5 M	replicate 1	693	11.22 M
	replicate 2	625	9.96 M	replicate 2	708	12.39 M
	replicate 3	589	10.4 M	reproduceable	364	11.53 M
	replicate 4	576	9.98 M	30d WT	peak number	peak coverage
	reproduceable	222	9.73 M	replicate 1	943	11.63 M
	30d WT	peak number	peak coverage	replicate 2	855	11.96 M
	replicate 1	851	10.14 M	reproduceable	411	11.06 M
	replicate 2	1049	10.66 M
	replicate 3	691	9.01 M
	replicate 4	579	8.56 M
	reproduceable	218	8.64 M
PRC2 mutant	Muscle			Head
	3d Pcl c421/+; Su(z)12 c253/+	peak number	peak coverage	3d Pcl c421/+; Su(z)12 c253/+	peak number	peak coverage
	replicate 1	438	9.27 M	replicate 1	594	11.89 M
	replicate 2	477	9.82 M	replicate 2	664	12.72 M
	reproduceable	301	9.56 M	reproduceable	377	12.2 M
	30d Pcl c421/+; Su(z)12 c253/+	peak number	peak coverage	30d Pcl c421/+; Su(z)12 c253/+	peak number	peak coverage
	replicate 1	442	8.23 M	replicate 1	695	12.2 M
	replicate 2	490	8.19 M	replicate 2	770	11.76 M
	reproduceable	255	8.04 M	reproduceable	382	11.66 M
	3d esc c289/+; E(z) c239/+	peak number	peak coverage
	replicate 1	420	9.51 M
	replicate 2	441	9.47 M
	reproduceable	269	9.42 M
	30d esc c289/+; E(z) c239/+	peak number	peak coverage
	replicate 1	575	8.56 M
	replicate 2	544	9.13 M
	reproduceable	291	8.5 M
H3K27me3 peak regions and related genes (3d)
#chr	peak start	peak end	size (bp)	associated genes
chr2L	1614294	1679572	65278	CR44603,CR45695,chinmo
chr2L	1686755	1705717	18962	cpb,chinmo
chr2L	575504	603954	28450	Pph13,cold,CG13689,Ptth,Gsc
chr2L	9576639	9614373	37734	gcm2,CG3841,Mtpalpha,gcm,CG4382,CR43621,CG31709,Trx-2
chr2L	18858331	18939794	81463	mRpL13,CR44738,CR44737,CG10602,tup,CR44739,ssp3,mir-4946
chr2L	20765648	20788692	23044	cad,Pomp
chr2L	20099560	20122380	22820	CG13970,Kua
chr2L	3656673	3687176	30503	Sfp24Ba,CG34340,Sfp24Bb,Sfp24Bc,CG42463
chr2L	7260937	7344211	83274	wg,Wnt6,Wnt4,CR45304
chr2L	11285236	11316164	30928	Osi21,CR43721,CR43409
chr2L	11201414	11215826	14412	ab,CR43859
chr2L	18713813	18819728	105915	CG43814,CR43804,CG17325,CR44904,CG15167,CG42305,CR43817,ham,CR44768,CG42752,CG10570,CG10348,CG17324,CG42502,CR44769
chr2L	5366028	5518004	151976	CR44745,CR45287,H15,CR43714,mid,CR31647,snoRNA:Me28S-A2486,CR42850,CR43715,CG14020,CR43713
chr2L	6526432	6557993	31561	CG31637,CR44776,CoVb,eya,Osm6
chr2L	7350312	7384466	34154	Wnt6,ninaC,Wnt10,CR44063
chr2L	3529279	3620340	91061	CR44310,CR43822,CR44747,CR43823,CG43815,Che-13,drm,Dot,CR44309,Spindly,CR44308,sob,odd
chr2L	12566375	12688743	122368	CR44597,CR44595,Ref2,CR44598,nub,pdm2,CG15485,CR44596
chr2L	15089403	15115304	25901	CG15269,CG15270,stc
chr2L	364902	403133	38231	al,CR43718,CG4213
chr2L	19456447	19479354	22907	CR45722,CR43839,tj,CG10026,CR45723
chr2L	22004724	22039771	35047	CG31693,tio,CR33987,CR45335,CG41434
chr2L	1943779	1975337	31558	tRNA:CR31942,CG7337,CG33673,erm,Der-1,CG15357
chr2L	543422	553400	9978	Ets21C,Spp,nAChRbeta3
chr2L	5016737	5033403	16666	vkg,Cg25C
chr2L	12075102	12094616	19514	CR44591,Pex19,prd,CG14947,CR44592,CR44593,CR44590,CR44594
chr2L	15465589	15487415	21826	CR45293,Tim17b2,CR45353,sna
chr2L	17243103	17267770	24667	CR44395,CR44396,beat-IIIc
chr2L	6799328	6852336	53008	tRNA:CR31631,Rca1,CG17376,CG11236,CG17375,CR44081,CG17377,CR43610,sens-2
chr2L	20148627	20153183	4556
chr2L	11219505	11230399	10894	ab
chr2L	12547793	12559168	11375	CG3964,slp1,CR44078,CR44077,CG3407,CR45449,CR44076,CR45451,slp2,CR45450,CR44983
chr2L	3812476	3863559	51083	CG9107,CG13996,CG9098,H2.0
chr2L	6008533	6023906	15373	CR44731
chr2L	14469099	14490823	21724	CG15262,CR43682,CG15260,ms(2)35Ci,CR45349,CG15263,CR43764
chr2L	15278007	15301977	23970	CG34380
chr2L	6167866	6187555	19689	l(2)gl,CG11023
chr2L	5112	13998	8886	salm,CR43681,CG14926,CR44586,CR44583,CR44585,CR44584,salr
chr2L	11318208	11473587	155379	CG9466,CR44415,CG42710,CG9483,CG9465,CG9468,CG12438,CR45260,CG32987,SoxN,CR45365,CG32988,CR44414,CG9463,CG45307,CG32983,CG32986
chr2L	8740802	8890057	149255	CG9466,CR44415,CG42710,CG9483,CG9465,CG9468,CG12438,CR45260,CG32987,SoxN,CR45365,CG32988,CR44414,CG9463,CG45307,CG32983,CG32986
chr2L	16372407	16491624	119217	Idgf1,CG4580,CG5888,CR44994,snoRNA:Me28S-A2958,Idgf3,Idgf2,dac
chr2L	491052	539502	48450	ush
chr2L	15305145	15446286	141141	CG4161,CR45374,CG15258,CR44862,wor,esg,CR44859,CR44861,CR44860,nht,CR45373,CG44869
chr2L	14405513	14459873	54360	elB,Pburs,CR44732,CR44730,CR44733,Cpr35B,CG15283,CR45726
chr2L	21805737	21938348	132611	CR44918,CR44917,CR44920,CR45334,CR44786,CR43762,CG11629,CG11634,CR45362,CR44919,CG1421,CG31600,CG1428,tsh
chr2L	14535757	14555948	20191	CR44853,CG4218
chr2L	2438542	2474440	35898	tRNA:Y1:22Fb,CR45286,tRNA:Y1:22Fa,dpp
chr2L	19079332	19114692	35360	amd,CR44905,CG10561,CG17344,CG43731,Lim3
chr2L	14560360	14589099	28739	CR44856,CR44855,CG3473,CG42680
chr2R	18233039	18275860	42821	fj,CR44420,CR44421,Ote
chr2R	24284157	24290803	6646	nvy
chr2R	14433475	14468288	34813	CR45277,Oaz
chr2R	21521403	21535011	13608	CR44725,CG30289
chr2R	12940928	13050230	109302	CG44250,CG13324,CG13321,Mdr49,Su(z)2,CG13323,Psc,CR44339,CG44251,CG33798
chr2R	14476421	14481341	4920	CR44462,L
chr2R	14196912	14216292	19380	Sox15,CG30069,VGAT,RpS23,mir-308
chr2R	12881890	12916814	34924	Aats-asp,CR44461,CR45141,vg,NAT1
chr2R	22216928	22298349	81421	CG5819,ari-2,CR43422,Oatp58Dc,Oatp58Da,dve,Oatp58Db,wdp,CG30278,CR44755
chr2R	14773045	14843219	70174	NaPi-T,CR45329,CG10205,kn,CG10202,hui
chr2R	25159633	25167270	7637
chr2R	24366936	24388807	21871	CG13578,tRNA:N5:60C,CR44811,bs,mAChR-A
chr2R	8007256	8053416	46160	Odc2,CG14762,CG12769,Optix,CR45267,CR43724,mir-4981
chr2R	23616729	23659397	42668	retn,CR45153,CG17664
chr2R	15666401	15675786	9385	fus
chr2R	17748262	17761403	13141	CG5009,CG10931,Sardh,HLH54F,CG5002
chr2R	19244578	19282651	38073	CG33454,CR44432,CG33453,rib,wbl,CG11906,CG7229
chr2R	24336939	24343368	6429
chr2R	11460831	11577312	116481	en,inv,E(Pc)
chr2R	11695494	11718906	23412	CR45377,Ir48a,Ir48b,pyr,CG13197
chr2R	25191137	25258595	67458	CG30428,Kr,CG30429,CG33680
chr2R	8632533	8644136	11603
chr2R	5707400	5754314	46914	ap
chr2R	15820974	15847973	26999	CG33465,CG8249,Poxn
chr2R	20551666	20560339	8673	Mgat1,lms,CG13430,CG18065
chr2R	18536052	18553007	16955	Pepck,CG45087,Rgk2
chr2R	8252910	8291385	38475	CG2291,CG30369,CG30375,CR44280,CG30376,CG12126,CG14759,CG14760,CG30371
chr2R	25085431	25142304	56873	CG43106,CG30430,lov
chr2R	7407747	7435738	27991	CG1701,CR44204,CR44203,CR44202,so,CG11145,Eaf
chr2R	9971454	9990123	18669	TER94,CG12134,CR43948,eve,CR45324
chr2R	9191054	9206000	14946	unpg,CG8027,CG8026,CG45085
chr2R	25035328	25073591	38263	Nplp1,gsb-n,gsb
chr2R	21820699	21830088	9389	CG13492
chr2R	23566844	23588162	21318	apt
chr2R	23078992	23105767	26775	Gr59a,Art7,Gr59d,RpL37b,Gr59c,CG9876,CG9877,CG42703,Gr59b,CG13538,CG43659
chr2R	15601154	15612886	11732
chr2R	24796682	24870241	73559	CG3650,CG3611,CR44829,CG42851,Orc4,Dll,CG12849,Atf-2
chr2R	20883464	20973014	89550	CR43160,Act57B,Rx,CG33704,CG15649,snoRNA:660,otp,CG9235,hbn
chr2R	9061030	9076750	15720	ana,CG8197,CR45924
chr2R	11783968	11800787	16819	Ir48c,ths
chr2R	6319855	6330275	10420
chr2R	22998765	23053746	54981	twi,CG42741,CG9896
chr2R	22671702	22684713	13011	CR44761,RYBP
chr2R	17799732	17842518	42786	grh,CR45270,Dhit
chr2R	18187699	18231046	43347	CR45310,CG14500,CR45311,CG14499,CG33958,CG30114,CR45147
chr2R	17309744	17340040	30296	mbl
chr3L	14110907	14190794	79887	nan,D,Sox21b,CR45887
chr3L	6895208	6941688	46480	CG45413,CG14820,CR45412,Prat2,CR45415,CR45414
chr3L	20605622	20663032	57410	CR44684,knrl,CR44681,CG13251,CR44682,CR44685,CR44683,CR44680
chr3L	15729553	15745764	16211
chr3L	3616926	3665232	48306	CG14974,dar1,CG43098,CG10862
chr3L	20674573	20710631	36058	kni
chr3L	14562472	14607570	45098	CG34039,CG42758,HGTX
chr3L	11917924	11950432	32508	CG11588,CG5718,CG7252,byn,CG5883,CG17826,Rpt4R,mir-285
chr3L	4005115	4022195	17080	fd64A,Mul1,CG14985
chr3L	7938141	7970393	32252	CG43880,exex
chr3L	21577119	21607984	30865	TfAP-2,CR43939,CR43940
chr3L	1927047	1937390	10343	CG5687,CR45826,Dbx
chr3L	741635	749011	7376	tRNA:M-i:61D
chr3L	13389701	13411643	21942	CG10222,Poc1,sens
chr3L	364854	403594	38740	CR45378,CR43969,CG13884,trh,CG1233
chr3L	1163966	1195078	31112	CG13912,LysX,Trh,bab2
chr3L	3840041	3896091	56050	CR43917,Fie,Gr63a,enc,snRNA:U11,CR45422,Awh,CR45379
chr3L	8999944	9047822	47878	CG5087,Doc2,CG5194,Doc1,Doc3,CG5144
chr3L	21448021	21485200	37179	Syx7,croc
chr3L	6979340	6996629	17289	CG43439,Galphai,CR46000,CG32388,bin
chr3L	7418973	7433073	14100	Rac2,CG42458
chr3L	21773418	21822319	48901	CR45958,eg,CG43895,CycH
chr3L	19642871	19687293	44422	Oat,tey,CR44678,CG8765
chr3L	409707	436307	26600	snmRNA:438,klar,CG13891
chr3L	12416443	12473066	56623	CG32102,CG10616,ArfGAP1,eyg,toe
chr3L	12542233	12733282	191049	CR43612,CR44553,sowah,CR32111,mirr,caup,CR43431,CR44552,ara
chr3L	1094053	1153079	59026	bab1,bab2
chr3L	12312373	12336605	24232	CG32105
chr3L	6868268	6888409	20141	CR45416
chr3L	6763591	6806721	43130	CR45759,vvl
chr3L	24717732	24754132	36400	scro
chr3L	20555334	20602136	46802	knrl
chr3L	10927848	11035916	108068	Fad2,klu,CR45248,CG32081,CR45249,CG32079,CR44547,CG14147,CR45745,snoRNA:Me18S-G962
chr3L	5834696	5869391	34695	vn
chr3L	10315471	10330968	15497	CR46004,mir-276b
chr3L	5876191	5896208	20017	CG13287,DNApol-epsilon58
chr3R	4894887	4907354	12467	Gnf1,CR45580
chr3R	15983342	16042902	59560	GATAe,CR44133,srp,pnr,CR42839,Hel89B
chr3R	18228985	18241006	12021	CG7156,repo
chr3R	7949778	7963187	13409	dsx
chr3R	17545940	17575732	29792	Hmx,Prx3
chr3R	23191025	23215573	24548	cnc,fzo
chr3R	32068060	32073043	4983	Map205
chr3R	14330918	14351014	20096	NK7.1
chr3R	28543283	28598502	55219	MRE23,fkh,CR43440,Noa36,CG12413
chr3R	30686867	30789372	102505	CG15543,CR45992,CG12069,zfh1,Npc2h,CR43238,CG11313,Pka-C2,Spn100A,CR46115,Npc2g,CG1340,CG31010,CR45189
chr3R	8128962	8233529	104567	CG7800,tRNA:R2:84Fb,tRNA:R2:84Fd,CG18249,tRNA:N5:84F,CR43303,Gie,CR45551,tRNA:R2:84Fa,tRNA:R2:84Fc,CR43302,tRNA:R2:84Fe,CR45549,CheA84a,CR45550,grn
chr3R	12222731	12303952	81221	CG12256,CG17738,CR46014,Cyp313a5,svp,Pglym87,CR46013,CG3942,CR44039,CG17404,CR44036,CG10014,Cyp313a2,CR43477,CG44038,CG3916,CR45582,CG44037,Sfp87B,Cyp313a3
chr3R	15626762	15665545	38783	CG43335,CG43336
chr3R	18108649	18157544	48895	tRNA:CR31242,CG14316,tRNA:CR31518,sr
chr3R	13839747	13964008	124261	CG9926,CG14362,Art9,CG31495,E5,ems,Ipp,CG9925,CG31517,Art6
chr3R	23283567	23330972	47405	CG6763,CG4434,pnt,CG17083,Cdc16
chr3R	16367916	16432714	64798	ss,CG10317,tRNA:CR31282,CG31279,CR45193,CR45631,CR45630,tRNA:CR31497,CG14880
chr3R	15609035	15618850	9815
chr3R	25132283	25154224	21941	CR46098,Bili,danr
chr3R	26010450	26035009	24559	Kaz-m1,E(spl)malpha-BFM,E(spl)m2-BFM,E(spl)m4-BFM,CR43643,E(spl)m5-HLH,CR45040,E(spl)m6-BFM,CR43644,E(spl)m3-HLH
chr3R	30892357	30948556	56199	CG15550,Cyp4c3,CG15549,Ptx1,CR44041,CG33483
chr3R	30601706	30639235	37529	CG2267,CR44136,CG44954,CG31016,CG31021,PH4alphaNE3,CR45571
chr3R	13055618	13079613	23995	pic,sim
chr3R	21527787	21571416	43629	slou,CR44033,CR43372,InR,CG7956,CG15498
chr3R	10511475	10524635	13160	hth,mir-4944
chr3R	21487339	21521376	34037	CG7922,C15,CR44032,CG7956
chr3R	26069604	26081890	12286	CR44950,dys
chr3R	12315701	12327798	12097	CR45584,tRNA:CR31432,CG10013
chr3R	26087896	26104149	16253	CR44319,dys
chr3R	29502931	29592579	89648	CG7567,CG2014,CR43613,Dr,Trc8,CG31041,alph,CG11470
chr3R	11388431	11395705	7274	pros
chr3R	7292682	7347813	55131	CG44335,CR44336,rn,nxf4,CG42544,CR44334,CG10029,CR44337,CG31496
chr3R	27189760	27203048	13288	Ser
chr3R	8316763	8340795	24032	CG7443,CR45215,Or85a,Ctr1B,CG9603,Poxm
chr3R	18052108	18108333	56225	CG14317
chr3R	16655278	16757210	101932	Ubx,CG31275,bxd,modSP
chr3R	21376465	21483154	106689	lbe,lbl,tin,CG7922,CR46046,CheB93b,CheB93a,mod(mdg4),CG6475,bap,CR43453,CG7907,CR44089
chr3R	4820201	4888399	68198	CG14659,CG14657,CG14658,opa,laf
chr3R	31081654	31088635	6981	Sox100B
chr3R	29681634	29717415	35781	CG7582,Obp99c,Obp99b,Dup99B,Obp99d,CR45569,Gycalpha99B,dmrt99B
chr3R	25075264	25098667	23403	fd96Cb,CG11920,CG33096,fd96Ca,CG33095
chr3R	31060977	31075154	14177	dco,Sox100B
chr3R	7924979	7944561	19582	dsx
chr3R	23127777	23150559	22782	hh,CG31457
chr3R	11351615	11379807	28192	KP78a,pros,CR46009,CR46010
chr3R	10613872	10676313	62441	hth,CG6465,CR44018
chr3R	25735558	25746601	11043	LpR1,CR46102,LpR2
chr3R	18367030	18389709	22679	Vha100-4,cona,CG14310,CG14309,CG7675,CR44946,gl,Nup43
chr3R	6659989	6698395	38406	Edg84A,agt,lab,Ccp84Ae,Ccp84Af,Ccp84Ag,Ccp84Ad,Ccp84Ac
chr3R	6707553	6808712	101159	CR44930,CR43435,CR42721,CG34297,Ama,CR45593,bcd,zen2,pb,zen,Dfd,mir-993
chr3R	16762383	16983082	220699	CR45750,iab-8,Glut3,CR43617,Ahcy89E,CR44945,abd-A,iab-4,Actn3,CR45751,Abd-B,VhaM9.7-d,mir-iab-8,mir-iab-4
chr3R	10439638	10503032	63394	CR44939,CR45576,CR44955
chr3R	6823998	7063747	239749	ftz,CG1988,CR45559,Scr,dj,CR43252,CR45902,Antp,CR45900,CR44933,CR45903,CR44932,CR45905,djl,Sodh-1,CR45899,CR45901,CG1979,CR44931,CR45904
chr3R	25156954	25194380	37426	dan,lobo
chr3R	17582866	17603428	20562	Sgs5,CG7606,CG7587
chr3R	8270243	8300830	30587	CG31464,CR44318,CG11672,ato,CG9626,CG31463,CG11671
chr4	1084256	1112170	27914	sv,Actbeta
chr4	490194	532774	42580	zfh2
chr4	410999	427144	16145	CR43437
chr4	972687	1009767	37080	toy,sphinx,fuss
chr4	696654	723095	26441	ey
chr4	800104	852092	51988	CG11231,Sox102F,CR33797,fd102C,CR45123
chrX	19532333	19559870	27537	mir-977,mir-2499,CG32532,mir-975,mir-976,mir-974,mir-972,mir-973,mir-4966
chrX	5992682	6035929	43247	CR44499,CG4766,rux,CR44498,mab-21
chrX	17751622	17793626	42004	OdsH,CG42684,unc-4
chrX	16231049	16245350	14301
chrX	9283539	9315701	32162	lz,CR44534
chrX	17796280	17820528	24248	CG12986,OdsH
chrX	4371291	4531872	160581	CG3556,CR45484,bi,CR43614,CG12688,CR32773
chrX	5528931	5613981	85050	CG34435,Vsx2,Vsx1
chrX	9687693	9779423	91730	CR44016,btd,CR42657,Sp1,CR43498
chrX	4554190	4627579	73389	CG12684,CG11444,CG3546,peb,CG12184
chrX	8722299	8837408	115109	CR45537,Lim1,CR43297
chrX	2138269	2141319	3050
chrX	5311212	5317751	6539	Sas10,dhd,CG15930,CG4198,TrxT
chrX	13362672	13370507	7835	dmrt11E,Syt12
chrX	14027386	14030535	3149
chrX	20633303	20649487	16184
chrX	7440992	7452502	11510	CG11368,CR45533,CR43199
chrX	8606122	8677631	71509	oc,CG12772,Caf1-180
chrX	580457	597595	17138	vnd
chrX	20677106	20719486	42380	CR45610,run,CR43862
chrX	8446086	8461255	15169	CG15347,CG32713,org-1
chrX	16109199	16223601	114402	mir-985,disco,disco-r
chrX	14034865	14038532	3667
chrX	17305992	17369764	63772	B-H2
chrX	7506491	7550618	44127	CG32720,CG43138,CG32719
chrX	7560834	7647500	86666	ct,CG12689,CR44502,CG11369
chrX	18239667	18319583	79916	os,CR45613,CR45608,upd3,CR45607,CR15061,CR45609,CG15059,CG6023,upd2
chrX	17370768	17413023	42255	CR43491,B-H1
chrX	7188063	7240908	52845	CG9650,CR44357
chrX	14074463	14097869	23406
