# Supplementary material for: Epigenetic drift of H3K27me3 in aging links glycolysis to healthy longevity in Drosophila
Source: eLife. 2018 May 29;7:e35368. doi: 10.7554/eLife.35368 (PMC5991832; doi:10.7554/eLife.35368)
Supplement: Supplementary file 2. — For each gene, two sgRNAs with indicated sequences, detailed deletion sites confirmed by Sanger sequencing, and PCR validation were shown. To name new CRISPR mutant, a superscript amended to the gene contained a letter c denoting CRISPR/Cas9-directed mutagenesis followed by the size of genomic deletion. Mutants were backcrossed (at least five generations) into 5905 (Flybase ID FBst0005905, w1118) to assure that phenotypes were not associated with any variation in background. Lifespan curves, together with 50% (median lifespan) and 10% survival data were listed. (for lifespan assay: 25°C; n ≥ 140 per genotype for curve; log-rank test). [file elife-35368-supp2.xls]

## Sheet: 工作表1
complex	genes	sgRNAs & sequence deletion	genotyping	life span curve	life span (total fly number n)			log-rank test
canonical Polycomb Repressive Complex 2	esc (H3K27 methylation)	5'-GGTGCTGTTGGTGGTATAGC-3' 5'-GGGCACTCGTAGACGGTCACC-3'	F:5'-GCAACGAGCCCGAGGAGTCGGAG-3' R:5'-GGTCGTACGACCAGGCGCAGGTG-3'	survival	survival	control (n=200)	esc +/- (n=200)	p < 0.0001
		5'-CAGGATGAGTCGGCCAGCTA …289bp… CCGTCTACGAGTGCCCTCGA-3'			0.5	69	86
					0.1	83	98
	E(z) (H3K27 methylation)	5'-GATCTGTACTGCGAGTCGA-3' 5'-GGGCGACGAGGTCCTCGATA-3'	F:5'-GGACGAGCACAACCACAATGTACAG-3' R:5'-CAGTCTCCAGCGGTTCTTCAGTTTC-3'	survival	survival	control (n=187)	E(z) +/- (n=181)	p < 0.0001
		5'-GTACAGGATCTGTACTGCGA …239bp… AGGATGGCAAGTTCATAGAG-3'			0.5	68	77
					0.1	83	86
	Pcl (H3K27 methylation)	5'-GATAAGCTGCGCAAGCTAGG-3' 5'-GAGCAGATCTACTGCTACTG-3'	F:5'-AGCGGTCACGTATGCGCTTCAGGAG-3' R:5'-GACCGTGCAGCAGAAAACAAAGAAC-3'	survival	survival	control (n=217)	Pcl +/- (n=199)	p = 0.0005
		5'-AATGGTGTGAACCGGATAAG …421bp… CTGCGGCAAACCGGGAAAAT-3'			0.5	62	70
					0.1	79	86
	Su(z)12 (H3K27 methylation)	5'-GGTGTACTCCGTCTGCTGA-3' 5'-GGCCCCGTGCGACGCACCT-3'	F:5'-CTACGACGTCTACCAGCAGAGTCCC-3' R:5'-GTACGACCGCTGGTTGCTAATCTCG-3'	survival	survival	control (n=216)	Su(z)12 +/- (n=214)	p < 0.0001
		5'-GCAATAATACCCGTCAGCAG …253bp… TCACCAGTCTGATGGTGTGC-3'			0.5	63	70
					0.1	74	86
	p55 (H3K27 methylation)	5'-GGTCACGTCCGGCAGCCACT-3' 5'-GGAGGCTTTGGATCGGTGTG-3'	F:5'-GAATCCTTCGACGACGCCGTCGAG-3' R:5'-GGGATTCCAAGAGAGTCCGTAGCC-3'	survival	survival	control (n=199)	p55 +/- (n=199)	n.s.
		5'-AATGGCCCTCGTTGACTGCC …192bp… TGCGGCAAAATCGAAATCGA-3'			0.5	70	70
					0.1	84	81
non-canonical Polycomb Repressive Complex 2	jing (H3K27 methylation)	5'-GCCTCCTTCCCACGCTCCAG-3' 5'-GTCGCAGCTGAAAGAGCAGA-3'	F:5'-CAACCAGCGCCATGTCCAAGCCG-3' R:5'-CGGCGTCCTGGGTGCGATGGCCACG-3'	survival	survival	control (n=200)	jing +/- (n=200)	p = 0.0002
		5'-GATCTGGAGCGGCATTAGGA …299bp… GAAGGCCCAACAGCAACAAC-3'			0.5	70	72
					0.1	83	93
	Jarid2 (H3K27 methylation)	5'-GATTCGGAAGCCTCGTCGAC-3' 5'-CATTGATGATGACAATTCAG-3'	F:5'-GACTTTCTTACCTTTCTATGCTTTC-3' R:5'-GAGTCACCCATTTTTATACCCTCAC-3'	survival	survival	control (n=200)	Jarid2 +/- (n=190)	p = 0.0003
		5'-GTCGACGGGAGCCAACAATA …386bp… GTCATTGATGATGACAATTC-3'			0.5	69	74
					0.1	82	84
Polycomb Repressive Complex 1 components	Psc (H3K27 methylation)	5'-GGTGTTGCTGTTGTTGTTG-3' 5'-GGAGGACCCAACGGCAGCTG-3'	F:5'-CAACGACAACGGCAACGAATAAGGC-3' R:5'-GAGTGCAGACACTCGACGATGGTGG-3'	survival	survival	control (n=175)	Psc +/- (n=198)	p < 0.0001
		5'-GCAGCATTAGCAGCAGCAAC …264bp… GGCTGCGTCTTCAACGGCGA-3'			0.5	70	73
					0.1	83	86
	Su(z)2 (H3K27 methylation)	5'-GGACAATATACCGCTCGCAGC-3' 5'-GGACAACGGTCTGGTGGAAG-3'	F:5'-CGATCCAACCACTGTGGATTACTG-3' R:5'-GTAGGCAGTACCTCATCCTTGTAG-3'	survival	survival	control (n=175)	Su(z)2 +/- (n=123)	p < 0.0001
		5'-GCGAGCGGTATATTGTCCGG …433bp… ACGGACAACGGTCTGGTGGA-3'			0.5	70	77
					0.1	83	89
	Sce (H2A ubiquitination)	5'-GGACACATCAGTTCGCTGTGG-3' 5'-GGCCATCCAGGAGAAGGTGA-3'	F:5'-GTCGCTGTACGAGCTGCAGCGCAAG-3' R:5'-CGATGTGCCCGAATGACCCGGATCC-3'	survival	survival	control (n=188)	Sce +/- (n=156)	p = 0.0002
		5'-GTGTCCCCGCGGAGCCTCCA …244bp… ATGGCTAAGTTCAACCAGAC-3'			0.5	68	72
					0.1	83	85
Pho complex	Sfmbt (H3K27 methylation)	5'-GCTCCGGGCAGCACCGAGGA-3' 5'-CGGTGGGTTGGTGCGCCACT-3'	F:5'-GCAGCTGCCAATAATGTACAAATGG-3' R:5'-CGGAATCGAAGTAGCGCAGGAAGAG-3'	survival	survival	control (n=175)	Sfmbt +/- (n=150)	p = 0.0002
		5'-ACGGCGGAGCAGTGGGCGAT …533bp… GCCATTAATTCCGCCCCGCA-3'			0.5	70	75
					0.1	83	86
MLL1/2	trx (H3K4 methylation)	5'-GGAATGGCACTGGGTGATG-3' 5'-GGATCGTTGCACTGCGTGT-3'	F:5'-CGCATCAACGAATCTGAAGCTTGGC-3' R:5'-GGTGGTTGCTTCTACGTCTGTGAAG-3'	survival	survival	control (n=179)	trx +/- (n=180)	p = 0.0001
		5'-TCCAAAAGCTTGCCCCACAT …499bp… TGTTGGCTGAAAAAATGTAT-3'			0.5	64	68
					0.1	75	82
	Mnn1 (H3K4 methylation)	5'-CTGTCTTTGACGACGGGAG-3' 5'-TTCCAGACGATCCTGTCGG-3'	F:5'-GGCAATCAGAAGAACCCCTGCCTGC-3' R:5'-CGCCACCACAGCCAGAGCAACGCCG-3'	survival	survival	control (n=199)	Mnn1 +/- (n=196)	p < 0.0001
		5'-ATACATCGAGCTGTCTTTGA …376bp… GAAGCCCAAGCCCCACCGCC-3'			0.5	64	57
					0.1	77	68
	Dpy30 (H3K4 methylation)	5'-GCAAACCCGACCGCTGCGCC-3' 5'-CCTGGCTCGCGAACGGCCCA-3'	F:5'-CGATGTATAAGTAAATTTTCGTGTC-3' R:5'-CTTTAAACGTTTATTATTTATTCAC-3'	survival	survival	control (n=175)	Dpy30 +/- (n=169)	p < 0.0001
		5'-CCAGCGCCCACAACAAATCC …275bp… TGGCCTCCTACCTACTAAAG-3'			0.5	70	75
					0.1	83	86
MLL3/4	Pa1 (H3K4 methylation)	5'-GGCGATGGAGCCCTGCGTCC-3' 5'-CTCCATGACGCCGGCGAAGT-3'	F:5'-ATTTCCAGTTCATTTGGATTGTTTA-3' R:5'-GTCGATGGTTGTAAAACGACTGATG-3'	survival	survival	control (n=209)	Pa1 +/- (n=291)	p < 0.0001
		5'-GCAATGGCAATTTCCGGGAC …281bp… AAGAAGAATGCCGAGAGCTC-3'			0.5	63	68
					0.1	82	85
	Ptip (H3K4 methylation)	5'-TCGAACGCTTTCTTAAGAG-3' 5'-TACAAAAACTGCATGCCCG-3'	F:5'-GTTCTCCTCTACCAACGGAAGCAAC-3' R:5'-CTGCTGTTGATGTTGCTGCTGCTGC-3'	survival	survival	control (n=194)	Ptip +/- (n=197)	p < 0.0001
		5'-GCAGATCGAACGCTTTCTTA …450bp… CCGTGGAGACGTATCATCCG-3'			0.5	63	71
					0.1	74	82
	Ncoa6 (H3K4 methylation)	5'-AACCACAACAGCAGCAGCA-3' 5'-CCCAACAGCAATTCATGAG-3'	F:5'-CGTACTGAGTCCGGTGGTGCCTTCC-3' R:5'-GGCATGAGCTGTCCAGCCATTTCGC-3'	survival	survival	control (n=195)	Ncoa6 +/- (n=200)	p = 0.0029
		5'-AGCAAGGACCACCACATCGC …421bp… AACAGCAATTCATGAGCGGC-3'			0.5	67	66
					0.1	80	77
PR-DUB complex	Asx (Histone H2A deubiquitination)	5'-CTGGTGGACGACGACGAGA-3' 5'-TCTCAAGCTTCGACCATGC-3'	F:5'-GCCGGATACGACGACGACGACGTCG-3' R:5'-CGAGAACGTTTGCTTGTTCAACAGC-3'	survival	survival	control (n=240)	Asx +/- (n=251)	p < 0.0001
		5'-GGACGACGACGAGAAGGATC …419bp… TCCTGGCCTCCATACCCGGT-3'			0.5	61	66
					0.1	71	82
	ash1 (H3K4, H3K36 methylation)	5'-GGACTGCGAATGAGAATCT-3' 5'-GGCATTTTCCTCGGACTCAG-3'	F:5'-CCGATTCCATTACGGATCAATCGAG-3' R:5'-CATGAAGTCTTGCAGCAAAGTTGAC-3'	survival	survival	control (n=200)	ash1 +/- (n=197)	p = 0.0011
		5'-AAGTCCAGAAAAATGTCTAC …275bp… CCAGCGACAACGAGTTACCT-3'			0.5	72	68
					0.1	81	79
	G9a (H3K9 methylation)	5'-GGCCAAATTACGCCACTTGA-3' 5'-GGAAGAAGGTAGGAAGGAAA-3'	F:5'-AACAGCATGTCCAGTACATTCAATA-3' R:5'-AACGCTAGCAGAACTAACAACAAGT-3'	survival	survival	control (n=181)	G9a +/- (n=194)	p = 0.0013
		5'-GAACTTGGCGGAAGACAAAA …237bp… AAATGGAGTACGATCAAGAT-3'			0.5	61	54
					0.1	75	73
	Set2 (H3K36 methylation)	5'-CCGTCTCCGGTTGCGTCACG-3' 5'-TTGGTGGCTCATCTCGAACA-3'	F:5'-GTAGATATCACTGCAAATCGGACAC-3' R:5'-CATACAGAAACCCAAGTCCAAGTTG-3'	survival	survival	control (n=200)	Set2 +/- (n=200)	p = 0.0001
		5'-AATCCGTCTCCGGTTGCGTC …385bp… CAATCATTGCCGCCACCACC-3'			0.5	64	69
					0.1	78	82
	Hmt4-20 (H4K20 methylation)	5'-GGCTAGTGAAGACGTTACGC-3' 5'-GGATTGCGATAGGCGGCTGA-3'	F:5'-GTGCACATCGTTTTGAATATACTTG-3' R:5'-TATATCGTAGTTCTGCGTGTGGATA-3'	survival	survival	control (n=176)	Hmt4-20 +/- (n=196)	p < 0.0001
		5'-TTCGGCCAGTAGCACCACCA …323bp… TCGCAATCCACTGGGATGTC-3'			0.5	70	55
					0.1	80	70
	l(3)mbt (H4K20 methylation)	5'-CGGCCTTTGTATGATCGTCC-3' 5'-CGAGATCGGCATGAAGCTAG-3'	F:5'-GCAAGACCAATGACTTTAAAAAGAG-3' R:5'-CTACTCCTCCATGTACGACTTCTG-3'	survival	survival	control (n=188)	l(3)mbt +/- (n=159)	n.s.
		5'-GAGCGGCCTTTGTATGATCG …505bp… ATCCGGAGAACTGCTCGCTC-3'			0.5	65	65
					0.1	79	82
	Enok (H3K23 acetylation)	5'-GCTCTACATGCTCGTCACCAA-3' 5'-GAAACTTTGTGTCTACAACGA-3'	F:5'-GAAGCTATATAAAAAGGGCAAATCC-3' R:5'-CTGTAATATTTGCGACCTCTTTTGC-3'	survival	survival	control (n=217)	Enok +/- (n=214)	n.s.
		5'-CCAAGGGCACTATCTGGGAT …423bp… CGAAACTGTGTCTACAAC-3'			0.5	63	63
					0.1	75	75
	Utx (H3K27 demethylation)	5'-AAGCACAAGGCGGCAAAGGA-3' 5'-CTACATATGTGCTGTGCAAC-3'	F:5'-CAAATCGCGCATTTGTACGAAGTTC-3' R:5'-CTCTGAGACAGGCCTTTCGACAGTC-3'	survival	survival	control (n=201)	Utx -/- (n=105)	p < 0.0001
		5'-CAAAACAAGCACAAGGCGGC …499bp… ATAAAGACCATAAAGCCGCG-3'			0.5	66	47
					0.1	77	70
	Tpi	5'-GATCGCCAAGACCCTGAGCT-3' 5'-TGGTGGCCTACGAGCCCGTC-3'	F:5'-CCAGTCATCGAGTTACCCACTTG-3' R:5'-CACCTCCTTGGAGATGTTGTCG-3'	survival	survival	control (n=193)	Tpi +/- (n=196)	n.s.
		5'-TCGCCGAGATCGCCAAGACC …511bp… CAATTGCAGGCTCAAGAGGT-3'			0.5	61	60
					0.1	78	78
	Pgi	5'-CGGTCGCTACTCCCTGTGGT-3' 5'-TGGGGCGAGCCTGGCACCAA-3'	F:5'-TTGTTTTGTTTTAGCCTGAGTCC-3' R:5'-TCGATAGCAGAATCTTGTGGTG-3'	survival	survival	control (n=180)	Pgi +/- (n=164)	n.s.
		5'-GGTGGGCGGTCGCTACTCCC …392bp… CTGGCCAGCACGCCTTCTACC-3'			0.5	54	54
					0.1	68	71
	piwi	5'-CGACGTTGCTCACACAATC-3' 5'-TGAGCTCTGCCGAGTGACT-3'	F:5'-CGTTGGATTCATATCGTGTGCTGAG-3' R:5'-GCTAGTCCGTCCGATTCTTGACCTG-3'	survival	survival	control (n=200)	piwi +/- (n=200)	p < 0.0001
		5'-ACATAATGCGACGTTGCTCA …362bp… TGGGCTCAATGCCGAGATGC-3'			0.5	67	78
					0.1	77	91
	miR-34	5'-GGCTATGCGCTTTGGCAGTG-3' 5'-GGAACTGGCTCATAATCACAT-3'	F:5'-CTGAAGTTGGTCGCAAAACATCCGC-3' R:5'-CTTTAGTTTGGCAACTGCTCAACCA-3'	survival	survival	control (n=197)	miR-34 -/- (n=213)	p < 0.0001
		5'-TAATCCAAACAAGTATTCTT …120bp… TAAAGCAACTTATAAAGGAC-3'			0.5	63	35
					0.1	75	43
