# Supplementary material for: Epigenetic drift of H3K27me3 in aging links glycolysis to healthy longevity in Drosophila
Source: eLife. 2018 May 29;7:e35368. doi: 10.7554/eLife.35368 (PMC5991832; doi:10.7554/eLife.35368)
Supplement: Supplementary file 3. — RNA-seq summary. This table summarizes five categories of genes and their transcriptional changes in long-lived PRC2 mutants of indicated genotype: (1) commonly upregulated and (2) downregulated genes in all PRC2 long-lived mutants; genes known to promote longevity upon upregulation, including (3) insulin pathway genes, (4) TOR signaling pathway genes, and (5) genes of miscellaneous pathways. RNA-seq was from muscle and head tissues of 30d-old male flies. [file elife-35368-supp3.xls]

## Sheet: 工作表1
mRNA-seq datasets
	genotype	age	tissue	method
Set 1	WT	30d	head,muscle	polyA-selected
	esc c289/+	30d	head,muscle	polyA-selected
	E(z) c239/+	30d	head,muscle	polyA-selected
	Pcl c421/+	30d	head,muscle	polyA-selected
	Su(z)12 c253/+	30d	head,muscle	polyA-selected
Set 2	WT	3d	head,muscle	polyA-selected
	WT	30d	head,muscle	polyA-selected
	esc c289/+;E(z) c239/+	30d	head,muscle	polyA-selected
Set 3	WT	3d	head,muscle	polyA-selected
	WT	30d	head,muscle	polyA-selected
	Pcl c421/+;Su(z)12c253/+	30d	head,muscle	polyA-selected
	muscle														head
			esc c289/+;E(z) c239/+		Pcl c421/+;Su(z)12 c253/+		esc c289/+		E(z) c239/+		Pcl c421/+		Su(z)12 c253/+				esc c289/+;E(z) c239/+		Pcl c421/+;Su(z)12 c253/+		esc c289/+		E(z) c239/+		Pcl c421/+		Su(z)12 c253/+
	ID	genes	log2FC	pval	log2FC	pval	log2FC	pval	log2FC	pval	log2FC	pval	log2FC	pval	ID	genes	log2FC	pval	log2FC	pval	log2FC	pval	log2FC	pval	log2FC	pval	log2FC	pval
overlapped up-regulation genes	FBgn0000064	Ald	0.254013	0.00351511	0.242927	0.00267132	0.424287	2.35e-07	0.406524	5.57e-07	0.244273	0.00283481	0.442366	3.22e-08	FBgn0003074	Pgi	0.348297	0.000156123	0.247941	0.00534381	0.209238	0.022614	0.397575	2.85e-05	0.267998	0.00414461	0.562807	2.75e-09
	FBgn0003074	Pgi	0.377931	1.57e-05	0.232927	0.00501984	0.361608	1.5e-05	0.463077	1.86e-08	0.300136	0.000270628	0.433742	1.01e-07	FBgn0021738	Crg-1	4.30553	1.76e-51	4.09606	1.11e-11	6.25458	7.18e-29	4.87787	3.71e-14	5.47849	9.28e-20	3.87514	8.35e-08
	FBgn0004507	GlyP	0.38844	0.0116991	0.422524	0.000128058	0.234561	0.00541837	0.27935	0.000736376	0.321422	0.000111954	0.339945	4.21e-05	FBgn0026415	Idgf4	0.209282	0.0273126	0.293557	0.0063023	0.202644	0.0426818	0.230977	0.0181866	0.259068	0.00830374	0.350427	0.000243056
	FBgn0086355	Tpi	0.611007	1.85e-12	0.443756	3.1e-07	0.333333	0.000127128	0.297893	0.000699261	0.288705	0.000880307	0.561113	8.42e-11	FBgn0031693	Cyp4ac1	0.626093	1.29e-06	0.777321	1.13e-12	0.421346	0.00990383	0.447941	0.00880543	0.513676	0.00207609	0.492503	0.0027033
	FBgn0003076	Pgm	0.389039	1.39e-05	0.313487	0.000217884	0.400715	5.42e-06	0.308245	0.00038113	0.247337	0.00454305	0.41951	1.02e-06	FBgn0031694	Cyp4ac2	0.394572	0.00476869	0.260459	0.0269706	0.358475	0.00614088	0.533028	6.49e-05	0.367179	0.00446725	0.790514	8.79e-10
	FBgn0003071	Pfk	0.39958	0.00667842	0.311968	0.0262556	0.401333	0.000797674	0.422097	0.000309294	0.247356	0.0412421	0.417675	0.000319553	FBgn0032076	CG9510	1.04302	2.49e-23	0.992069	0.000362485	0.481276	0.0485423	0.878177	0.000335997	0.524416	0.0285653	1.30962	7.87e-08
	FBgn0032889	CG9331	0.557309	0.000109101	0.291371	0.0214942	0.565365	3.37e-09	0.488731	3.02e-07	0.197155	0.0435886	0.681665	4.67e-13	FBgn0034290	CG5773	0.6113	1.06e-06	0.582734	0.000131773	0.369687	0.0020092	0.622046	1.46e-07	0.923998	1.57e-15	0.569682	1e-06
	FBgn0035207	CG9153	0.683733	1.74e-06	0.359132	0.0097542	1.1782	1.15e-35	1.17161	3.07e-34	0.856802	5.22e-19	1.31643	3.89e-43	FBgn0035206	CG9186	0.497702	0.000235012	0.28521	0.0105386	0.827276	4.01e-09	0.715554	6.42e-07	0.410304	0.00522354	0.814308	6.47e-09
	FBgn0034618	CG9485	0.367326	0.000815166	0.637749	4.8e-07	0.484404	0.00054602	0.532908	0.000106183	0.463759	0.000844867	0.692966	3.45e-07	FBgn0036806	Cyp12c1	0.791828	3.04e-08	0.430761	0.00536534	0.327423	0.0328639	0.877565	4.28e-09	0.345978	0.0224333	0.877406	1.83e-09
	FBgn0032076	CG9510	0.777793	1.79e-12	0.697183	0.00101525	0.557667	2.09e-05	0.537311	6.22e-05	0.357607	0.00594108	0.872443	2.31e-11	FBgn0037607	CG8036	0.401859	1.27e-05	0.316626	0.0459868	0.226764	0.0218123	0.505958	5.65e-07	0.479438	8.85e-07	0.674889	2.37e-11
	FBgn0034290	CG5773	0.817551	1.04e-11	0.512234	0.00175033	0.696382	2.96e-06	0.546694	0.000472892	0.932428	2.07e-09	0.542997	0.00045855	FBgn0043535	Obp57a	0.739722	1.61e-07	0.733098	9.49e-08	0.685338	1.85e-06	0.835193	1.39e-08	0.477476	0.00174034	0.833026	5.12e-09
	FBgn0043535	Obp57a	1.06756	1.08e-13	0.55558	0.00408854	0.583925	0.000764445	0.701533	5.79e-05	0.361996	0.0278877	0.4874	0.00325762	FBgn0050104	NT5E-2	0.535971	0.000153823	0.648962	0.00315422	0.851813	8.72e-07	0.952578	3.6e-08	0.753486	1.42e-05	1.19241	3.04e-13
	FBgn0005427	ewg	0.382381	0.00120441	0.489007	1.34e-05	0.278311	0.0261559	0.516969	5.55e-05	0.440877	0.000478007	0.595276	2.53e-06	FBgn0053493	CG33493	0.486347	0.000198025	0.533407	1.21e-05	0.44289	0.0188904	0.451267	0.0149756	0.506619	0.00643385	0.763617	2.78e-05
	FBgn0259716	CG42370	0.330461	0.0189046	0.496079	0.00573051	0.33527	0.0106236	0.442884	0.00107262	0.796563	9.63e-10	0.688841	1.62e-07	FBgn0086355	Tpi	0.403191	2.2e-05	0.259937	0.0168156	0.226497	0.0210001	0.33377	0.000696614	0.325669	0.000806418	0.607885	5.66e-10
	FBgn0024989	CG3777	1.04689	1.54e-05	1.8435	1.7e-17	0.694589	0.0305039	1.5818	8.75e-08	0.879103	0.00659257	1.7346	2.04e-09	FBgn0259716	CG42370	0.845082	9.06e-07	0.955326	3.11e-06	0.348786	0.0180677	0.62185	3.27e-05	1.02026	2.19e-12	0.874682	2.07e-09
	FBgn0034660	lox2	1.23531	5.64e-05	1.30862	0.000244471	2.48821	2.82e-06	1.88601	0.00131218	1.75403	0.00299398	1.94767	0.000762476
overlapped down-regulation genes	FBgn0033397	Cyp4p3	-1.07343	0.00874657	-0.126002	0.671464	-1.54952	1.01e-07	-1.3988	2.22e-06	-0.779852	0.00535996	-1.8514	6.48e-10	FBgn0032282	CG7299	-0.372497	0.0360739	-0.90273	3.05e-09	-0.356338	0.0282893	-0.515828	0.0015817	-0.535101	0.000641188	-0.599835	0.000265048
	FBgn0035298	SCOT	-0.288136	0.00798496	-0.227735	0.0290125	-0.570573	2.22e-07	-0.533238	1.17e-06	-0.289737	0.00698503	-0.519395	3.09e-06	FBgn0035382	Or63a	-0.553636	0.041761	-0.6866	0.000830064	-0.628339	0.0107286	-0.512594	0.033064	-0.755285	0.00312547	-0.631905	0.0087005
	FBgn0039316	CG11893	-4.72041	2e-08	-1.59418	0.00103208	-1.49613	1.47e-15	-1.21177	1.22e-10	-2.16587	2.33e-28	-1.95492	3.92e-24	FBgn0035969	CG4476	-0.724164	0.0392614	-0.980512	0.00435046	-1.02729	0.00765302	-1.03505	0.00775106	-0.932005	0.0163927	-0.848661	0.0200911
	FBgn0053296	CG33296	-1.01189	2.86e-10	-0.692235	2.27e-07	-0.38885	0.00766425	-0.579746	0.000140317	-0.439767	0.00350464	-0.592512	8.29e-05	FBgn0039084	CG10175	-0.597221	4.2e-06	-0.863525	1.25e-14	-0.363807	0.00550032	-0.345869	0.00809493	-0.368977	0.00385405	-0.997241	4.61e-14
	FBgn0259145	CG42260	-2.25755	2.82e-16	-0.979576	0.00109458	-1.00676	0.000311339	-0.892046	0.00146198	-1.22119	2.82e-05	-0.992612	0.000494894	FBgn0053296	CG33296	-0.935694	2.37e-07	-1.01428	7.23e-06	-0.376459	0.0123326	-0.931913	1.22e-09	-0.503933	0.000472689	-0.985029	2.63e-11
	FBgn0261269	conv	-0.61048	0.041927	-0.88166	0.00019943	-0.607402	0.0257925	-0.661967	0.0187134	-0.604115	0.0277065	-1.15131	6.99e-05	FBgn0259145	CG42260	-1.509	3.68e-09	-1.27737	3.8e-19	-0.788214	1.49e-08	-0.755689	1.03e-07	-0.99607	6.89e-12	-1.24173	3.21e-18
Insulin pathway genes	FBgn0038197	foxo	-0.102697	0.22113	-0.042935	0.666735	0.0296273	0.808586	-0.0271708	0.756849	-0.0372028	0.665683	0.0323801	0.735541
	FBgn0036046	Ilp2	NA	0.941664	-0.131802	1	0.421563	1	NA	0.610457	-0.919752	1	0.0513103	1
	FBgn0044050	Ilp3	-0.252418	1	0.833592	0.807332	Inf	1	NA	NA	Inf	0.989987	Inf	0.985637
	FBgn0011296	l(2)efl	0.295699	0.0435263	-0.284338	0.101303	-0.137539	0.704859	0.163907	0.443969	0.369183	0.104739	-0.273176	0.299068
	FBgn0261560	Thor	-0.0719646	0.83404	-0.0598196	0.626593	-0.222206	0.0516274	-0.204031	0.0801335	-0.212515	0.0620442	-0.0402181	0.680249
	FBgn0001257	ImpL2	0.000860588	0.805046	-0.0685831	0.649186	0.27205	0.0531489	0.133183	0.311523	0.204007	0.156707	-0.161259	0.236593
TOR signaling pathway genes	FBgn0026317	Tsc1	0.0980932	0.42939	0.0444254	0.66788	0.127214	0.278186	0.182043	0.152248	0.222633	0.0708062	0.0811334	0.540033
	FBgn0005198	gig	0.0455331	0.72441	0.0788388	0.51341	-0.0315329	0.861121	0.0281802	0.803192	-0.0267204	0.932148	0.0181995	0.810328
	FBgn0021796	Tor	0.0973979	0.30222	0.034754	0.738229	-0.10794	0.495234	-0.0357258	0.840221	-0.162173	0.185591	-0.0940584	0.460881
	FBgn0015806	S6k	-0.0240077	0.735763	-0.0489739	0.565746	-0.0347275	0.677573	-0.0258036	0.811713	-0.13798	0.195843	-0.0617595	0.547146
Known pro-lifespan genes upon increase of expression	FBgn0004057	Zw	0.106067	0.557666	0.390584	0.000150703	0.153043	0.138916	0.241505	0.0150873	0.407888	3.59e-05	0.403057	3.63e-05
	FBgn0040319	Gclc	-0.115129	0.213495	-0.101654	0.24791	-0.0800457	0.295413	-0.113671	0.182998	-0.110803	0.181265	-0.20802	0.0194639
	FBgn0046114	Gclm	0.268334	0.21894	0.152603	0.440519	0.334126	0.00622946	0.344455	0.00397515	0.239573	0.052425	0.348021	0.00557377
	FBgn0003462	Sod1	-0.0572036	0.41621	-0.00803117	0.885256	-0.153217	0.203095	-0.102627	0.402721	-0.00500798	0.998298	-0.0240564	0.918973
	FBgn0010213	Sod2	-0.118105	0.189777	0.00107007	0.935445	-0.0043401	0.956361	0.00580479	0.884711	0.139196	0.106228	-0.00298579	0.974757
	FBgn0033631	Sod3	0.179488	0.116548	-0.0479754	0.655	0.0455687	0.68967	0.00670633	0.989265	-0.186492	0.113539	-0.0190896	0.891712
	FBgn0010222	Nmdmc	-0.0941555	0.640167	-0.299426	0.328316	-1.10895	7.01e-06	-1.06892	1.39e-05	-0.911428	0.000194732	-1.16246	2.36e-06
	FBgn0024291	Sir2	0.221768	0.0479663	0.0293974	0.837696	0.368766	0.000872435	0.0672299	0.573086	0.223049	0.0470664	0.139641	0.240466
	FBgn0037913	fabp	0.693642	0.000949844	0.52562	0.00739254	0.134176	0.404654	0.318854	0.0544227	0.334009	0.0434037	0.113285	0.458217
	FBgn0035169	CG13890	0.0199627	0.959882	-0.0229473	0.929138	0.0927607	0.762414	0.404402	0.076949	0.0606069	0.810277	0.0710404	0.760728
	FBgn0001225	Hsp26	-0.669197	0.246559	-0.144272	0.581302	0.408759	0.735496	0.251446	0.799614	0.855344	0.28154	-0.0237406	0.895127
	FBgn0001226	Hsp27	-0.512794	0.405388	-0.42661	0.223985	0.563178	0.671478	0.474892	0.654697	1.00147	0.305071	0.0697223	0.987657
	FBgn0051216	Naam	0.153004	0.296565	-0.103507	0.508545	0.178103	0.363299	-0.164688	0.451715	0.144897	0.487388	-0.19776	0.355279
	FBgn0086768	Pcmt	0.131231	0.16316	0.134124	0.151731	0.0601218	0.552004	-0.151001	0.148253	-0.0834388	0.404421	-0.163882	0.118932
	FBgn0263316	Mrp4	0.0663566	0.545902	-0.0360561	0.783084	0.0566295	0.726496	0.0315269	0.825435	0.0674164	0.665337	-0.11775	0.406469
	FBgn0263755	Su(var)3-9	0.251439	0.585885	-0.387066	0.294664	0.572525	0.112013	0.0552554	0.901977	0.327057	0.332003	-0.14193	0.820021
	FBgn0034246	Dcr-2	-0.0137611	0.913759	0.0514138	0.627893	-0.135067	0.244738	0.0773582	0.493469	-0.0286485	0.821642	-0.00663035	0.966578
	FBgn0038074	Gnmt	-1.35667	0.00691888	-0.148589	0.712572	-1.56167	4.24e-10	-1.55891	2.21e-10	-0.141906	0.585001	-1.41841	4.79e-09
	FBgn0262169	magu	0.0130912	0.931017	-0.0354536	0.685129	-0.0330017	0.822681	0.127804	0.233441	-0.063218	0.558364	0.189906	0.0793466
	FBgn0033448	hebe	0.0301349	0.941514	0.0255442	0.804758	-0.0202751	0.848748	-0.0625472	0.542733	0.044106	0.660041	-0.0414232	0.715046
	FBgn0000565	Eip71CD	-0.214317	0.0370643	-0.240917	0.094909	-0.269476	0.0238987	-0.398702	0.000962208	-0.10174	0.413716	-0.476984	6.42e-05
	FBgn0001247	Ide	-0.125703	0.190208	-0.0761766	0.416764	-0.0791323	0.434055	-0.0352182	0.722463	-0.0500208	0.637813	-0.124765	0.246045
	FBgn0266557	kis	0.0174984	0.849882	-0.0123157	0.891164	0.0646058	0.63411	0.0592253	0.653485	-0.204181	0.174033	0.059538	0.67516
	FBgn0022764	Sin3A	0.101807	0.236014	0.0161636	0.860881	0.115226	0.394473	-0.041618	0.710531	-0.141141	0.223386	0.0333085	0.824428
	FBgn0003435	sm	-0.115199	0.296181	0.0789455	0.42196	-0.122103	0.271659	-0.116092	0.260516	-0.214267	0.0361213	-0.122644	0.23923
	FBgn0038880	SIFaR	-0.140074	0.85337	0.202328	0.635886	0.0366233	1	0.700708	0.169312	0.391262	0.480009	0.475305	0.405357
	FBgn0012051	CalpA	-0.0242805	0.889475	-0.0245853	0.802991	-0.147808	0.172765	0.0507297	0.646529	-0.0636603	0.53487	-0.128531	0.220321
	FBgn0034009	CG8155	0.0420759	0.563239	0.103915	0.396852	0.101529	0.556845	0.162681	0.27841	0.109127	0.489267	0.190281	0.195937
	FBgn0024432	Dlc90F	0.0493604	0.671334	-0.0423051	0.796931	0.0327562	0.77924	-0.033982	0.898804	0.172289	0.191384	-0.0642848	0.697427
	FBgn0053138	AGBE	0.31522	0.00059488	0.207728	0.0172456	0.126111	0.1541	-0.0683416	0.465439	0.101458	0.253567	0.102653	0.222097
	FBgn0032699	CG10383	0.0775233	0.454788	0.109513	0.697258	-0.193292	0.088894	-0.606772	3.43e-07	-0.161252	0.176863	-0.24003	0.0456152
	FBgn0002719	Men	-0.0683826	0.645885	-0.0069306	0.929467	-0.196561	0.159294	-0.228225	0.105912	-0.153123	0.285084	0.0685562	0.534249
	FBgn0043792	CG30427	0.00749557	0.799974	-0.261491	0.118997	0.0276108	0.783894	-0.175319	0.255454	-0.210008	0.178638	0.121339	0.34927
	FBgn0035977	PGRP-LF	-0.125214	0.516232	-0.995346	1.2e-07	-0.0200902	0.943998	-0.409025	0.0497302	-0.0843816	0.652438	-0.812217	0.000145881
	FBgn0261545	CG42663	0.00155316	0.977666	0.13689	0.240262	0.20124	0.219274	-0.0244449	0.765552	0.154854	0.352462	0.346756	0.0244495
	FBgn0034312	CG10916	-0.246694	0.180838	-0.0996343	0.60161	-0.0772867	0.691939	0.124296	0.52204	0.44524	0.0200595	0.193891	0.33135
	FBgn0015269	Nf1	-0.0906575	0.321082	0.0975551	0.324806	-0.0759778	0.602572	0.120033	0.445297	-0.180725	0.216158	0.0402498	0.854444
	FBgn0004373	fwd	-0.0948042	0.3483	0.00949168	0.935759	-0.0894142	0.412905	0.000509567	0.982535	-0.189332	0.0596737	-0.113858	0.273425
	FBgn0014141	cher	0.241521	0.00826148	0.0447112	0.756806	0.011597	0.899946	0.130452	0.138512	-0.0389564	0.655612	0.0372731	0.705142
	FBgn0015765	p38a	0.0682479	0.513948	0.12693	0.312373	-0.0892436	0.540652	-0.118232	0.41398	-0.0842219	0.537825	-0.0639605	0.675028
	FBgn0027492	wdb	-0.000683541	0.981747	-0.0265482	0.779526	0.152435	0.110006	0.101016	0.297089	-0.0741576	0.414537	0.0667283	0.503474
	FBgn0027779	VhaSFD	0.110322	0.18556	-0.0307625	0.698155	-0.022642	0.759221	-0.102352	0.218574	-0.0731071	0.363206	-0.216295	0.0115961
	FBgn0028707	Mt2	-0.338304	0.710438	0.0790757	0.910408	-0.234772	0.623662	-0.0572456	0.963053	-0.00650991	1	-0.337819	0.463433
	FBgn0033799	GLaz	-0.162938	0.168281	-0.234652	0.156548	0.389169	0.00565313	-0.0358115	0.674409	-0.0882974	0.422482	0.0829719	0.635314
	FBgn0036191	Sug	-0.14698	0.284143	-0.1985	0.116392	-0.3927	0.00665222	-0.265464	0.0745987	-0.146061	0.320759	-0.142313	0.363883
	FBgn0038167	lkb1	0.0851851	0.582726	0.0538389	0.683449	-0.0463219	0.776873	0.108285	0.559921	0.0915515	0.657308	0.124996	0.524185
	FBgn0041342	Cct1	0.0108143	0.953617	0.0565995	0.635296	-0.326116	0.000553231	-0.279079	0.0028169	-0.0763807	0.471227	-0.133019	0.20194
	FBgn0052672	Atg8a	-0.0608898	0.485641	0.0376984	0.751051	0.0221948	0.897809	-0.0450599	0.610493	-0.0924425	0.297664	-0.0201105	0.884906
	FBgn0053126	NLaz	0.0506267	0.630291	0.132063	0.226833	0.201912	0.0970199	0.181154	0.110667	0.0416225	0.726425	0.253919	0.0210156
	FBgn0000556	Ef1alpha48D	0.0322494	0.783953	-0.0757733	0.378738	0.412903	3.31e-07	0.152698	0.0590131	0.0694075	0.399041	0.229725	0.00413572
	FBgn0040309	Jafrac1	0.018361	0.885051	-0.107106	0.226749	0.198068	0.0174259	0.163129	0.0588935	0.248027	0.00380846	0.243788	0.00392302
	FBgn0010303	hep	0.0288567	0.706124	-0.0273722	0.755226	-0.0295173	0.843692	-0.0158526	0.866059	-0.00335381	0.94832	-0.0088782	0.891624
	FBgn0001230	Hsp68	-0.428088	0.408832	-0.60149	0.00038346	0.464299	0.706409	0.529026	0.548357	1.03953	0.209257	0.0482135	0.973903
