# Supplementary material for: Epigenetic drift of H3K27me3 in aging links glycolysis to healthy longevity in Drosophila
Source: eLife. 2018 May 29;7:e35368. doi: 10.7554/eLife.35368 (PMC5991832; doi:10.7554/eLife.35368)
Supplement: Supplementary file 4. — This table summarizes metabolic genes and their transcriptional changes in long-lived PRC2 mutants of indicated genotype. RNA-seq was from head and muscle tissues of 3d- and 30d-old male flies. [file elife-35368-supp4.xls]

## Sheet: Sheet1
co-upregulated genes in PRC2 single mutant
	Head												Muscle
			esc c289/+		E(z) c239/+		Pcl c421/+		Su(z)12 c253/+		3d vs 30d				esc c289/+		E(z) c239/+		Pcl c421/+		Su(z)12 c253/+		3d vs 30d
	ID	genes	log2FC	pval	log2FC	pval	log2FC	pval	log2FC	pval	log2FC	pval	ID	genes	log2FC	pval	log2FC	pval	log2FC	pval	log2FC	pval	log2FC	pval
Glycolysis genes	FBgn0003074	Pgi	0.209238	0.022614	0.397575	2.85e-05	0.267998	0.00414461	0.562807	2.75e-09	0.328319	0.000335354	FBgn0003074	Pgi	0.361608	1.5e-05	0.463077	1.86e-08	0.300136	0.000270628	0.433742	1.01e-07	-1.31257	3.71e-52
	FBgn0086355	Tpi	0.226497	0.0210001	0.33377	0.000696614	0.325669	0.000806418	0.607885	5.66e-10	-0.0302445	0.777492	FBgn0086355	Tpi	0.333333	0.000127128	0.297893	0.000699261	0.288705	0.000880307	0.561113	8.42e-11	-1.41134	8.85e-58
	FBgn0003076	Pgm	0.0968923	0.397934	0.285689	0.0124199	0.0855808	0.456956	0.594726	1.8e-07	0.137568	0.114462	FBgn0003076	Pgm	0.400715	5.42e-06	0.308245	0.00038113	0.247337	0.00454305	0.41951	1.02e-06	-0.682775	9.17e-15
	FBgn0003071	Pfk	-0.00971089	0.903788	-0.0216163	0.806921	-0.0213621	0.825996	0.0327463	0.748383	-0.217663	0.00589354	FBgn0003071	Pfk	0.401333	0.000797674	0.422097	0.000309294	0.247356	0.0412421	0.417675	0.000319553	-2.32582	2.17e-56
	FBgn0000064	Ald	0.126462	0.174756	0.147782	0.113656	0.143733	0.109565	0.235416	0.0124692	0.0386053	0.631133	FBgn0000064	Ald	0.424287	2.35e-07	0.406524	5.57e-07	0.244273	0.00283481	0.442366	3.22e-08	-1.6199	5.48e-80
	FBgn0014869	Pglym78	0.0643188	0.489156	0.207362	0.0406636	0.161213	0.106302	0.362675	0.000285965	-0.248011	0.00229794	FBgn0014869	Pglym78	0.375459	5.04e-05	0.468309	1.85e-07	0.248207	0.00722876	0.454345	4.71e-07	-2.41215	9.77e-32
	FBgn0000579	Eno	0.17001	0.0736879	0.147175	0.120558	0.0980323	0.295684	0.29122	0.00188808	-0.152516	0.0422903	FBgn0000579	Eno	0.324842	0.000110018	0.199638	0.015403	0.234129	0.00480777	0.352153	1.31e-05	-1.79407	2.5e-61
	FBgn0267385	PyK	0.0334552	0.700079	0.101638	0.297442	0.0854869	0.361852	0.24942	0.0077678	-0.234857	0.00215853	FBgn0267385	PyK	0.348116	0.000506547	0.239666	0.014272	0.224339	0.0251363	0.318764	0.000874285	-1.73878	8.19e-81
	FBgn0043783	CG32444	0.644953	0.0476609	0.505591	0.123509	0.512349	0.115493	1.26867	0.00012978	0.688261	0.0675949	FBgn0043783	CG32444	0.852777	1.12e-05	0.540755	0.00584199	0.511807	0.008328	1.02055	1.34e-07	0.575472	0.0177619
	FBgn0000055	Adh	0.700963	1.14e-05	-0.007105	0.947662	0.12867	0.419909	0.140508	0.405256	0.731282	0.00111348	FBgn0000055	Adh	0.791035	7.77e-09	-0.124314	0.436301	-0.161825	0.273764	0.100478	0.508332	-0.122645	0.484963
	FBgn0001091	Gapdh1	0.264454	0.0149368	0.211542	0.0511921	0.138474	0.187118	0.363183	0.000604963	-0.590057	4.05e-08	FBgn0001091	Gapdh1	0.417194	0.000201841	0.176712	0.116385	0.196771	0.0787677	0.287381	0.00899512	-3.59418	3.31e-83
	FBgn0001092	Gapdh2	0.060723	0.529948	0.135356	0.155698	0.0862324	0.350053	0.266309	0.00485946	-0.211308	0.00608149	FBgn0001092	Gapdh2	0.137906	0.112153	0.195463	0.0203208	0.136957	0.0977128	0.26877	0.00102561	-1.57149	4.91e-42
	FBgn0001186	Hex-A	0.139841	0.162737	0.164152	0.0973294	0.250034	0.0124329	0.085558	0.399521	-0.0836617	0.27209	FBgn0001186	Hex-A	0.122781	0.155218	0.0409547	0.605202	0.0750624	0.383364	0.0488565	0.517733	-1.10201	6.43e-37
	FBgn0001187	Hex-C	0.166866	0.250149	0.221929	0.11948	0.155091	0.275178	0.566486	4.87e-05	0.524203	9.86e-05	FBgn0001187	Hex-C	0.419028	0.000722057	0.144589	0.267946	0.241362	0.0536371	0.43344	0.000285052	0.644941	7.08e-06
	FBgn0001258	ImpL3	-0.496719	0.00529316	-0.275825	0.147328	-0.327593	0.0734234	-0.175896	0.377693	0.946412	0.000596688	FBgn0001258	ImpL3	-0.63585	0.000445735	-0.162844	0.341049	0.0830771	0.702023	-0.455842	0.00970163	0.362997	0.0274454
	FBgn0010548	Aldh-III	0.090913	0.397615	-0.133884	0.165732	-0.289878	0.0038076	-0.128719	0.195227	0.115015	0.171676	FBgn0010548	Aldh-III	0.136279	0.136563	-0.0973239	0.275651	-0.0587228	0.483573	-0.10675	0.214441	0.0781967	0.355434
	FBgn0011270	Pglym87	-0.248687	1	-0.397394	0.89074	-0.130421	1	-0.327374	0.92872	0.610574	0.608179	FBgn0011270	Pglym87	0.341888	1	-0.128326	1	0.600633	0.788649	0.151812	1	0.172443	0.995216
	FBgn0011768	Fdh	0.25965	0.0189271	-0.131075	0.229242	-0.0706201	0.547271	0.168669	0.112182	0.177928	0.0508644	FBgn0011768	Fdh	0.108338	0.217243	-0.285432	0.0057859	0.0201951	0.752209	-0.071616	0.547631	0.245381	0.0110288
	FBgn0012034	AcCoAS	-0.0319874	0.733504	0.138905	0.129892	0.0341855	0.624108	0.306718	0.00107624	0.313112	0.0532871	FBgn0012034	AcCoAS	-0.0486996	0.540263	0.00981506	0.912383	0.00453568	0.953188	0.208618	0.00861125	0.750351	3.33e-08
	FBgn0012036	Aldh	-0.0723734	0.681263	0.221826	0.247813	-0.202932	0.302777	0.437457	0.0204383	0.019806	0.933804	FBgn0012036	Aldh	-0.0962728	0.337698	0.0879914	0.307683	-0.213343	0.0292314	0.277733	0.00190975	-0.428124	3.47e-07
	FBgn0250906	Pgk	0.0681533	0.523777	0.161382	0.107413	0.0410793	0.658583	0.287354	0.00302275	-0.207143	0.0274305	FBgn0250906	Pgk	0.205879	0.0647961	0.176503	0.10631	0.107189	0.344421	0.255269	0.0152198	-2.21053	1.05e-47
	FBgn0026060	Mipp2	-0.589746	0.0884081	-0.276863	0.458338	-0.106935	0.757643	-0.165667	0.594589	-0.34046	0.210321	FBgn0026060	Mipp2	0.326292	0.486525	0.718687	0.138189	0.760795	0.116461	0.693351	0.139557	-0.355893	0.362512
	FBgn0026061	Mipp1	0.0780668	0.489413	0.0685208	0.556916	0.0269323	0.852943	-0.000676234	0.953018	-0.463251	1.16e-06	FBgn0026061	Mipp1	0.367902	0.000231915	0.270375	0.00655895	0.122015	0.253567	0.203886	0.0403549	-0.902917	4.51e-21
	FBgn0028325	l(1)G0334	0.0377872	0.688358	0.0891974	0.368239	-0.0257688	0.851367	0.163257	0.0904555	-0.194039	0.0171236	FBgn0028325	l(1)G0334	0.148629	0.108086	0.0947838	0.300097	0.0580565	0.564285	0.176711	0.0411077	-1.40697	6.03e-41
	FBgn0028540	CG9008	0.0543348	0.642715	0.0251494	0.829981	0.0062662	0.955109	0.317011	0.00847987	0.715685	4.44e-07	FBgn0028540	CG9008	0.254907	0.0359691	0.115031	0.31172	0.213664	0.0607113	0.32197	0.00436978	0.414556	0.00150042
	FBgn0029722	CG7024	0.187344	0.828982	0.748154	0.179984	0.798573	0.155169	0.755409	0.171517	-0.806935	0.153128	FBgn0029722	CG7024	0.15809	0.708357	0.573376	0.278441	-0.173964	1	1.10136	0.026778	0.532706	0.267606
	FBgn0031451	CG9961	1.44022	0.221733	0.633176	0.838341	-0.784837	0.840697	-1.13557	0.656618	0.0176143	1	FBgn0031451	CG9961	2.57863	0.0445288	1.48215	0.438328	-0.919752	1	0.670464	0.967414	1.16606	0.379265
	FBgn0031463	G6P	0.125563	0.758464	-0.13996	0.649517	-0.354575	0.2398	-0.072296	0.83289	-0.453389	0.039023	FBgn0031463	G6P	-0.107988	0.985787	0.897166	0.367987	0.528327	0.688421	1.33158	0.109372	-0.740295	0.215069
	FBgn0031912	CG5261	0.0540569	0.582478	0.0718878	0.475166	-0.0450635	0.689367	0.164559	0.099881	-0.515938	6.63e-10	FBgn0031912	CG5261	0.369515	4.17e-05	0.201291	0.0267638	0.0511447	0.604153	0.34768	8.96e-05	-2.35981	1.2e-56
	FBgn0032820	fbp	-0.0164665	0.891776	0.183835	0.165059	0.1149	0.340989	0.361697	0.00594094	0.607129	0.00302925	FBgn0032820	fbp	0.137089	0.200689	0.198892	0.0587174	0.213847	0.0341768	0.221575	0.0296087	-0.375278	0.0323012
	FBgn0033377	Pmm45A	-0.132927	0.306042	-0.172263	0.191357	0.00404362	0.996657	-0.00433745	0.971326	-0.0355865	0.73787	FBgn0033377	Pmm45A	-0.0457879	0.812579	-0.178525	0.194771	-0.0160137	1	-0.0856407	0.610972	0.128539	0.299886
	FBgn0034356	CG10924	0.178996	0.67668	-0.976462	0.0358302	-2.84272	6.63e-09	-0.208875	0.706544	1.18504	0.13626	FBgn0034356	CG10924	0.25634	0.0473191	-0.601943	4.55e-06	-0.96356	6.5e-13	-0.201058	0.155222	-0.498272	0.0048958
	FBgn0035679	CG10467	0.15464	0.293373	-0.0308347	0.837452	0.00958168	1	0.195913	0.17696	0.484508	0.000564023	FBgn0035679	CG10467	0.256508	0.0379445	0.007775	0.912544	0.26458	0.0334588	0.363773	0.00259765	0.168698	0.2819
	FBgn0036402	CG6650	0.141371	0.332877	0.20996	0.147589	0.135664	0.360256	0.226651	0.113341	0.0737236	0.513269	FBgn0036402	CG6650	0.13065	0.502977	0.217944	0.225901	0.143584	0.460427	0.364768	0.0372766	0.153856	0.321445
	FBgn0036723	CG12229	-0.182215	0.691019	-0.228749	0.57108	0.0860686	0.807739	-0.23226	0.540883	0.243046	0.389809	FBgn0036723	CG12229	-0.928505	0.0677998	-0.461811	0.421039	-0.527526	0.325644	-0.449858	0.400274	-0.148466	0.799897
	FBgn0036762	CG7430	0.0290465	0.791313	-0.00248825	1	-0.0668495	0.558808	0.142968	0.140597	-0.677692	1.07e-16	FBgn0036762	CG7430	0.081944	0.339066	0.0430333	0.602916	0.0163764	0.863233	0.144306	0.0820675	-1.97328	1.79e-40
	FBgn0036857	CG9629	0.200314	0.267412	0.523617	0.00285276	-0.109817	0.586128	0.358965	0.0359026	0.179483	0.413279	FBgn0036857	CG9629	0.296126	0.0555556	0.474425	0.00189309	0.0805427	0.636734	0.30694	0.0413276	0.149194	0.314247
	FBgn0037537	CG2767	0.140958	0.173275	-0.10938	0.318505	0.0851539	0.437432	-0.0880781	0.436233	0.0503205	0.577693	FBgn0037537	CG2767	0.253108	0.0242045	0.0529953	0.710434	0.112547	0.356185	0.0351257	0.778028	0.342938	0.00212309
	FBgn0038952	CG7069	0.466342	0.411172	0.782767	0.183895	0.488232	0.512851	0.73779	0.183791	-0.0571199	0.973039	FBgn0038952	CG7069	0.714317	0.124856	1.19918	0.00877574	0.506088	0.320176	0.620605	0.185659	-0.971934	0.0046768
	FBgn0039635	CG11876	0.0992218	0.400664	0.12089	0.297607	0.025898	0.852029	0.241113	0.0329711	-0.595814	1.3e-10	FBgn0039635	CG11876	0.21505	0.0167788	0.144283	0.113813	0.139832	0.123744	0.179138	0.0450125	-2.10526	1.88e-85
	FBgn0051075	CG31075	0.080786	0.703827	0.11149	0.576299	-0.0411122	0.953858	0.339546	0.0942893	-0.0755075	0.516747	FBgn0051075	CG31075	0.0891832	0.563151	0.0120702	0.896542	-0.0196003	0.946976	0.101835	0.455821	-0.282818	0.0175533
TCA cycle genes	FBgn0001248	Idh	0.097968	0.557646	0.120178	0.417901	-0.138064	0.36085	0.234706	0.103177	0.306603	0.00189927	FBgn0001248	Idh	-0.132402	0.179191	-0.178445	0.0757228	-0.150417	0.135	-0.141407	0.183366	0.469734	1.81e-08
	FBgn0004888	Scsalpha	0.186277	0.148322	0.0594062	0.620676	-0.0610708	0.690677	0.31467	0.0121481	-0.134855	0.0913136	FBgn0004888	Scsalpha	0.216219	0.0123643	-0.00496646	0.977236	0.0777094	0.389173	0.106023	0.212619	-0.851122	3e-22
	FBgn0010100	Acon	-0.0642344	0.505951	-0.0338022	0.754305	-0.152259	0.123042	-0.0710389	0.482522	-0.358109	4.23e-06	FBgn0010100	Acon	0.112031	0.273015	0.179939	0.0479063	0.0055801	0.909188	0.361912	3.82e-05	-1.4646	7.55e-66
	FBgn0010352	Nc73EF	-0.114591	0.208965	-0.0650656	0.497765	-0.181015	0.0636012	-0.241983	0.0104879	-0.293447	0.000143805	FBgn0010352	Nc73EF	0.146072	0.080608	0.163172	0.0448306	-0.0987446	0.187158	0.29139	0.000277243	-0.678873	8.46e-16
	FBgn0014028	SdhB	-0.127002	0.202086	-0.129488	0.197493	-0.0927478	0.350887	0.00443891	0.95664	-0.156741	0.0601899	FBgn0014028	SdhB	0.0568119	0.53607	-0.0355642	0.680271	0.131863	0.129815	0.0952155	0.243385	-0.902084	1.46e-26
	FBgn0020236	ATPCL	-0.162525	0.119506	-0.003475	1	0.432653	7.74e-06	0.416778	2.09e-05	0.363512	0.000638667	FBgn0020236	ATPCL	-0.295232	0.000386621	-0.0889187	0.296691	0.394793	1.54e-06	0.202199	0.0109281	0.745348	8.04e-12
	FBgn0024957	Irp-1B	0.015249	0.930405	-0.0609787	0.706335	-0.341245	0.0442031	0.0499153	0.757688	0.544652	5.18e-06	FBgn0024957	Irp-1B	-0.08435	0.265683	-0.277726	0.00144111	-0.290734	0.000749006	-0.0226448	0.774367	0.55064	8.9e-10
	FBgn0024958	Irp-1A	0.0448716	0.753449	0.108001	0.399816	0.0909665	0.486233	0.148513	0.210478	-0.11371	0.276077	FBgn0024958	Irp-1A	-0.0137232	0.985815	0.0487369	0.705149	-0.0818555	0.569154	-0.0537577	0.732681	0.109603	0.333921
	FBgn0027291	l(1)G0156	0.111707	0.266404	-0.0358869	0.757442	-0.0737913	0.480715	-0.0276237	0.805927	-0.793872	7.34e-22	FBgn0027291	l(1)G0156	0.312008	0.000515448	0.0695392	0.465455	0.0738164	0.464547	0.233037	0.00758238	-2.29121	1.16e-95
	FBgn0028325	l(1)G0334	0.0377872	0.688358	0.0891974	0.368239	-0.0257688	0.851367	0.163257	0.0904555	-0.194039	0.0171236	FBgn0028325	l(1)G0334	0.148629	0.108086	0.0947838	0.300097	0.0580565	0.564285	0.176711	0.0411077	-1.40697	6.03e-41
	FBgn0028336	l(1)G0255	0.0972005	0.431889	0.0884569	0.430746	0.0250547	0.782822	0.269454	0.0187561	-0.0644124	0.447961	FBgn0028336	l(1)G0255	0.0578672	0.504277	-0.0436914	0.640492	0.00893446	0.905721	0.075266	0.327826	-0.916535	9.81e-26
	FBgn0029118	Sucb	0.227582	0.128654	0.123528	0.423093	0.166493	0.304907	0.334415	0.0172534	0.148051	0.244698	FBgn0029118	Sucb	-0.154318	0.315305	-0.27967	0.0546612	-0.291533	0.0489468	-0.0897271	0.538947	0.272344	0.0520811
	FBgn0029722	CG7024	0.187344	0.828982	0.748154	0.179984	0.798573	0.155169	0.755409	0.171517	-0.806935	0.153128	FBgn0029722	CG7024	0.15809	0.708357	0.573376	0.278441	-0.173964	1	1.10136	0.026778	0.532706	0.267606
	FBgn0029890	CG4095	-0.163069	0.838755	-0.446697	0.578824	0.211004	0.711964	0.489327	0.397156	0.232067	0.70651	FBgn0029890	CG4095	0.102629	1	-0.0258655	0.968597	0.0234349	1	0.144978	1	0.175721	1
	FBgn0031912	CG5261	0.0540569	0.582478	0.0718878	0.475166	-0.0450635	0.689367	0.164559	0.099881	-0.515938	6.63e-10	FBgn0031912	CG5261	0.369515	4.17e-05	0.201291	0.0267638	0.0511447	0.604153	0.34768	8.96e-05	-2.35981	1.2e-56
	FBgn0034356	CG10924	0.178996	0.67668	-0.976462	0.0358302	-2.84272	6.63e-09	-0.208875	0.706544	1.18504	0.13626	FBgn0034356	CG10924	0.25634	0.0473191	-0.601943	4.55e-06	-0.96356	6.5e-13	-0.201058	0.155222	-0.498272	0.0048958
	FBgn0036762	CG7430	0.0290465	0.791313	-0.00248825	1	-0.0668495	0.558808	0.142968	0.140597	-0.677692	1.07e-16	FBgn0036762	CG7430	0.081944	0.339066	0.0430333	0.602916	0.0163764	0.863233	0.144306	0.0820675	-1.97328	1.79e-40
	FBgn0037643	skap	0.00169717	0.969948	-0.0572714	0.581138	-0.0943826	0.384633	0.141587	0.118344	0.265619	0.00509623	FBgn0037643	skap	0.0676616	0.431197	-0.1098	0.184982	0.00504834	0.979065	-0.0346189	0.664343	-0.702591	2.2e-16
	FBgn0037873	SdhC	-0.0756933	0.532125	-0.0615637	0.619053	-0.0536175	0.668697	0.051191	0.632686	-0.350858	0.000103975	FBgn0037873	SdhC	0.268141	0.00209661	0.0834595	0.326956	-0.0586676	0.481974	0.272994	0.00103081	-0.98594	1.88e-11
	FBgn0037891	CG5214	0.0330076	0.768211	0.0141658	0.873502	-0.0105999	0.926644	0.0961655	0.326549	-0.296534	0.000392627	FBgn0037891	CG5214	0.278047	0.00170558	0.096811	0.291641	0.116687	0.211752	0.225329	0.0100293	-1.02501	1.34e-32
	FBgn0038708	CG6255	-0.733579	0.982033	-0.438066	1	0.181494	1	0.776682	0.692036	0.204635	1	FBgn0038708	CG6255	-1.36395	0.574533	-2.18126	0.409914	-0.620413	0.826723	-1.19937	0.608046	3.47799	0.0616755
	FBgn0038922	CG6439	0.0242519	0.872266	-0.000616101	0.993492	-0.0693294	0.525994	-0.119995	0.259377	-0.621803	5.53e-13	FBgn0038922	CG6439	0.180669	0.0419757	0.041211	0.625453	0.0295022	0.753828	0.182239	0.0298966	-1.36286	4.02e-42
	FBgn0039358	CG5028	0.019235	0.853024	0.00176432	0.969999	-0.0839178	0.398364	-0.119519	0.238671	-0.454232	2.54e-08	FBgn0039358	CG5028	0.170201	0.05545	0.177995	0.0377637	-0.0894596	0.231557	0.24081	0.00377256	-0.984462	1.62e-30
	FBgn0039635	CG11876	0.0992218	0.400664	0.12089	0.297607	0.025898	0.852029	0.241113	0.0329711	-0.595814	1.3e-10	FBgn0039635	CG11876	0.21505	0.0167788	0.144283	0.113813	0.139832	0.123744	0.179138	0.0450125	-2.10526	1.88e-85
	FBgn0051874	CG31874	-1.41964	0.551571	-1.06354	0.679289	-2.00702	0.403772	#NAME?	0.109106	-0.567844	0.939726	FBgn0051874	CG31874	1.06905	0.526918	0.829795	0.688588	0.128865	1	-0.320558	1	-0.623616	0.788191
	FBgn0052026	CG32026	#NAME?	0.134204	-2.01735	0.432628	-1.16233	0.686641	#NAME?	0.124257	-0.331821	0.920726	FBgn0052026	CG32026	-0.374502	0.781423	0.145709	1	-0.0124016	1	-0.365884	0.82536	1.0052	0.448497
	FBgn0261439	SdhA	-0.044255	0.604031	-0.122749	0.213564	-0.0937559	0.356811	-0.126717	0.188102	-0.2386	0.00309049	FBgn0261439	SdhA	0.233113	0.0101296	0.291722	0.000771449	0.103233	0.31615	0.393794	4.56e-06	-1.23189	2.21e-47
	FBgn0261955	kdn	0.0330849	0.743987	-0.110249	0.276649	-0.0972245	0.36065	-0.101513	0.30716	-0.938714	8.88e-30	FBgn0261955	kdn	0.273294	0.00139015	0.0626472	0.47487	0.0903512	0.306838	0.171963	0.0432717	-3.01973	2.05e-71
	FBgn0262559	Mdh2	0.0513042	0.680816	0.18571	0.119414	-0.0123368	0.977604	0.356015	0.0028502	-0.38885	9.88e-07	FBgn0262559	Mdh2	0.253124	0.00206651	0.168041	0.0444208	0.191244	0.02289	0.316291	0.000142482	-1.78065	4.94e-38
	FBgn0262782	Mdh1	0.160966	0.289796	0.262342	0.0776139	0.0210227	0.861907	0.43995	0.00254893	0.217916	0.0067474	FBgn0262782	Mdh1	0.101007	0.229149	0.0674694	0.396878	0.00251285	0.93483	0.0938673	0.225846	0.454055	1.54e-07
Pentose phosphate genes	FBgn0004057	Zw	0.0852028	0.425341	0.246058	0.0320073	0.161108	0.162893	0.566761	4.04e-07	0.21439	0.0785487	FBgn0004057	Zw	0.153043	0.138916	0.241505	0.0150873	0.407888	3.59e-05	0.403057	3.63e-05	0.345084	0.000910508
	FBgn0030239	CG17333	0.141961	0.330156	0.197366	0.174632	0.0536642	0.708246	0.422612	0.0020009	0.471252	0.00111727	FBgn0030239	CG17333	0.00398801	0.897501	0.0199519	0.791329	0.0887034	0.381916	0.137648	0.18186	0.593246	3.4e-07
	FBgn0004654	Pgd	0.024142	0.791639	0.191006	0.0641447	0.0610319	0.556282	0.411341	3.5e-05	0.425367	0.000408966	FBgn0004654	Pgd	-0.0236728	0.774742	0.0740556	0.413912	0.287598	0.00117553	0.21339	0.0129438	0.521392	1.5e-05
	FBgn0050410	Rpi	0.175645	0.321394	0.299528	0.08998	0.227788	0.194077	0.597333	0.00065215	0.28975	0.110064	FBgn0050410	Rpi	0.14584	0.12759	0.183132	0.0708622	0.235825	0.0208363	0.246806	0.0147964	-0.452175	3.05e-05
	FBgn0036030	CG6767	-0.258993	0.012141	-0.139795	0.188351	-0.369184	0.000498427	-0.318534	0.00277905	0.288259	0.010898	FBgn0036030	CG6767	-0.174433	0.189519	-0.137323	0.30299	-0.307814	0.0245461	0.0315734	0.77654	0.533383	1.6e-06
Oxidative phosphorylation genes	FBgn0001989	l(2)35Di	-0.00431146	0.990206	0.0422043	0.780158	0.0564722	0.743659	0.30076	0.0474403	-0.487753	5.69e-07	FBgn0001989	l(2)35Di	0.1747	0.0740298	0.0373103	0.715135	-0.00121877	0.980157	0.102633	0.2735	-1.15846	4.62e-23
	FBgn0003360	sesB	0.108302	0.25603	-0.0257403	0.817262	-0.0781704	0.436625	-0.0295246	0.789183	-0.968078	5.75e-36	FBgn0003360	sesB	0.272587	0.00151003	0.0536484	0.545457	-0.054354	0.45398	0.12513	0.117459	-2.30753	7.93e-68
	FBgn0005671	Vha55	0.011449	0.904756	-0.0637506	0.515841	-0.0409125	0.686133	-0.127037	0.180556	-0.495675	2.45e-10	FBgn0005671	Vha55	-0.0395843	0.676973	-0.000103435	0.995861	0.0317029	0.707856	-0.0581626	0.497973	-0.384133	9.33e-06
	FBgn0010217	ATPsyn-beta	-0.0119772	0.914463	-0.00523512	0.9728	-0.139454	0.152726	0.0499957	0.546731	-0.606116	2.76e-15	FBgn0010217	ATPsyn-beta	0.19162	0.0340085	0.14288	0.095517	0.0684832	0.48578	0.128674	0.12693	-2.09335	6.76e-55
	FBgn0010516	wal	0.120291	0.441697	0.0608396	0.681144	-0.0198138	0.925192	0.396499	0.00726015	0.171227	0.0397824	FBgn0010516	wal	0.055095	0.467413	-0.033341	0.746193	-0.0944498	0.314021	0.114649	0.147086	-0.0223543	0.802215
	FBgn0010612	l(2)06225	0.0161636	0.882429	0.0933684	0.498978	0.0364061	0.763982	0.206119	0.114303	-0.55528	3.7e-11	FBgn0010612	l(2)06225	0.0877741	0.389167	-0.00501966	0.926075	-0.0294384	0.712492	0.11237	0.191474	-1.71409	1.07e-27
	FBgn0011211	blw	0.0389058	0.677036	0.00219921	0.955468	-0.0660869	0.53779	0.0937449	0.290633	-0.673071	1.93e-18	FBgn0011211	blw	0.147766	0.0826858	0.128405	0.12047	0.051247	0.570128	0.145981	0.0757425	-1.89525	4.28e-53
	FBgn0011227	ox	0.166362	0.226804	-0.0835593	0.617037	0.189408	0.169886	0.20375	0.12874	-0.361539	0.000399626	FBgn0011227	ox	0.178285	0.0749171	0.0792127	0.437521	-0.160946	0.0645584	0.186789	0.0363846	-0.906032	3.12e-08
	FBgn0011361	mtacp1	0.038867	0.778894	0.0173062	0.874615	0.0167258	0.902764	0.143827	0.212579	-0.662284	1.86e-12	FBgn0011361	mtacp1	-0.0636168	0.619837	-0.131778	0.294848	-0.106712	0.393731	-0.0214848	0.995718	-1.69147	7.86e-23
	FBgn0011455	l(3)neo18	-0.0422867	0.684686	-0.0247429	0.827938	-0.0185935	0.839703	0.0566162	0.56111	-0.290205	0.00137047	FBgn0011455	l(3)neo18	-0.00701722	0.869506	-0.081682	0.320684	0.0271016	0.800719	0.0450861	0.584646	-0.880226	2.8e-09
	FBgn0013672	mt:ATPase6	0.0439607	0.710721	-0.265189	0.0868929	-0.308306	0.0447694	-0.049996	0.830444	0.114692	0.382287	FBgn0013672	mt:ATPase6	-0.188417	0.266018	-0.73267	2.59e-05	-0.560428	0.0015396	-0.281943	0.124447	-1.98487	9.65e-25
	FBgn0013673	mt:ATPase8	-0.260323	0.0712966	-0.583338	7.16e-05	-0.544424	0.000146886	-0.333117	0.0149707	0.0570642	0.707323	FBgn0013673	mt:ATPase8	-0.0987524	0.725569	-0.454806	0.0886715	-0.499103	0.0723859	-0.0532105	0.855566	-1.83163	1.13e-23
	FBgn0013678	mt:Cyt-b	0.119526	0.244438	-0.185857	0.105958	-0.130365	0.261104	-0.162474	0.159673	-0.0913789	0.608451	FBgn0013678	mt:Cyt-b	0.1598	0.348221	-0.664847	9.39e-06	-0.497771	0.00104	-0.34926	0.0234252	-1.99368	6.16e-54
	FBgn0013680	mt:ND2	-0.454758	0.089265	-0.393158	0.149571	-0.385898	0.126498	-0.433354	0.116098	0.239101	0.106726	FBgn0013680	mt:ND2	-0.716583	0.0140114	-0.648718	0.0270626	-0.169972	0.559965	-0.141908	0.643436	-0.440823	0.00314538
	FBgn0013683	mt:ND4L	-0.0688332	0.795036	-0.328669	0.195246	-0.750881	0.0025877	-0.692284	0.00458277	0.306583	0.496013	FBgn0013683	mt:ND4L	-0.273807	0.332159	-0.49678	0.102723	-0.712349	0.0206803	-0.267276	0.419837	-1.86381	3.99e-10
	FBgn0013684	mt:ND5	0.0111875	0.905885	-0.285198	0.0333921	-0.243561	0.0634185	-0.227695	0.103775	-0.110157	0.40087	FBgn0013684	mt:ND5	0.068352	0.722424	-0.675685	9.07e-06	-0.35449	0.0213904	-0.343972	0.02866	-2.19241	9.29e-95
	FBgn0014028	SdhB	-0.127002	0.202086	-0.129488	0.197493	-0.0927478	0.350887	0.00443891	0.95664	-0.156741	0.0601899	FBgn0014028	SdhB	0.0568119	0.53607	-0.0355642	0.680271	0.131863	0.129815	0.0952155	0.243385	-0.902084	1.46e-26
	FBgn0014391	sun	0.0413987	0.709095	0.0815937	0.500176	-0.00407849	0.972141	0.199657	0.0926496	-0.837652	5.87e-18	FBgn0014391	sun	0.23958	0.0198628	0.0269845	0.75543	0.0274697	0.768616	0.137717	0.164434	-2.81135	1.56e-31
	FBgn0015031	cype	0.146888	0.16973	-0.0387377	0.696644	0.015295	0.896701	0.142608	0.159851	-0.42367	1.37e-06	FBgn0015031	cype	0.226893	0.0152513	-0.0799493	0.369958	0.0256868	0.806468	0.0946012	0.266153	-0.439931	0.00359729
	FBgn0015324	Vha26	-0.00918872	0.904942	-0.04884	0.621323	-0.0416505	0.692915	-0.144582	0.13418	-0.416941	1.1e-07	FBgn0015324	Vha26	-0.0396104	0.569737	-0.00870016	0.881688	-0.10135	0.217348	-0.129863	0.114938	-0.466211	6.89e-08
	FBgn0016119	ATPsyn-Cf6	-0.00739064	0.949708	-0.0982957	0.439673	-0.0980806	0.482618	0.0117759	0.858332	-0.429046	9.36e-07	FBgn0016119	ATPsyn-Cf6	0.23937	0.0332521	0.00650742	0.997477	0.0593762	0.632787	0.144655	0.180453	-1.63186	1.89e-22
	FBgn0016120	ATPsyn-d	-0.00920641	0.973932	0.0348628	0.766047	-0.0442356	0.728501	0.0780399	0.485831	-0.514752	8.4e-10	FBgn0016120	ATPsyn-d	0.0300595	0.722208	-0.0517549	0.578183	-0.0647743	0.455551	-0.0719442	0.447943	-1.51364	1.07e-25
	FBgn0016687	Nurf-38	0.0999201	0.447526	0.13167	0.346635	0.0332563	0.786977	0.393496	0.00492649	0.478608	1.37e-08	FBgn0016687	Nurf-38	0.10412	0.179099	0.042263	0.596994	0.0392531	0.596493	0.0882435	0.280964	0.627846	4.14e-12
	FBgn0016691	Oscp	0.0757708	0.62058	0.0597988	0.694402	-0.0837642	0.581813	0.212119	0.129218	-0.565553	1.23e-11	FBgn0016691	Oscp	0.177833	0.0505457	-0.00354814	0.915118	0.0113085	0.979813	0.102744	0.228276	-1.63631	2.48e-32
	FBgn0017566	ND75	0.057737	0.595326	0.00545437	0.959426	-0.0761824	0.445153	0.0814916	0.376742	-0.434824	4.63e-08	FBgn0017566	ND75	0.101368	0.255904	0.178307	0.0348133	-0.00189608	0.898502	0.213253	0.00957991	-0.64976	1.38e-14
	FBgn0017567	ND23	0.0402302	0.72066	0.0122933	0.920503	-0.035972	0.805777	0.0726171	0.482713	-0.222264	0.0158762	FBgn0017567	ND23	0.240955	0.0114022	0.292506	0.000902536	0.135985	0.147744	0.183545	0.0389246	0.11459	0.323889
	FBgn0019624	CoVa	0.0271482	0.862514	0.10244	0.405174	-0.046623	0.724736	0.161359	0.176497	-0.558825	6.38e-12	FBgn0019624	CoVa	0.165831	0.0808623	-0.0165824	0.790888	-0.047442	0.502857	0.127818	0.154024	-1.77958	1.45e-67
	FBgn0019644	ATPsyn-b	-0.0534988	0.68028	-0.031828	0.810204	-0.0633918	0.66072	0.171665	0.181899	-0.641908	1.57e-15	FBgn0019644	ATPsyn-b	0.0463901	0.742476	0.0534207	0.651401	0.0679043	0.577797	0.156468	0.141875	-2.0531	1.29e-62
	FBgn0019957	ND42	-0.131071	0.230214	-0.0887042	0.427926	-0.0939805	0.393139	0.0898608	0.362698	-0.591808	5.3e-12	FBgn0019957	ND42	0.020862	0.901394	-0.0512101	0.542725	-0.0635763	0.432625	0.0486542	0.570651	-1.43967	4.83e-27
	FBgn0020235	ATPsyn-gamma	0.0562641	0.6611	0.0509317	0.660705	-0.0705196	0.53101	0.17052	0.1333	-0.680578	6.02e-17	FBgn0020235	ATPsyn-gamma	0.197928	0.06922	0.0235439	0.825417	-0.0511754	0.589684	0.149757	0.133949	-2.5	7.44e-42
	FBgn0021906	RFeSP	0.0310576	0.78745	-0.0776697	0.51663	-0.0367894	0.751342	0.106594	0.335265	-0.345125	2.38e-05	FBgn0021906	RFeSP	0.14416	0.119827	0.0806329	0.36914	0.038309	0.712426	0.131609	0.130032	-0.828517	4.9e-22
	FBgn0021967	Pdsw	0.0371156	0.835338	0.136988	0.408581	0.0273323	0.876387	0.260812	0.095724	-0.40078	2.21e-05	FBgn0021967	Pdsw	0.0405109	0.757088	-0.142847	0.323651	-0.108324	0.455997	0.0575926	0.611055	-1.38285	2.04e-23
	FBgn0022097	Vha36-1	0.013146	0.922824	-0.0428806	0.677039	-0.0426465	0.678138	0.0159396	0.860397	-0.411402	2.12e-06	FBgn0022097	Vha36-1	0.00181321	0.895683	-0.0606958	0.501164	-0.0389367	0.608678	-0.05782	0.496048	-0.134117	0.143096
	FBgn0025839	CG3621	0.123836	0.497006	0.112387	0.514398	-0.0234217	0.892383	0.115208	0.446937	-0.472282	2.6e-06	FBgn0025839	CG3621	0.156088	0.244598	-0.0729485	0.648911	-0.206958	0.145522	0.0417003	0.682996	-0.780086	6.29e-16
	FBgn0026753	Vha13	0.0732253	0.480168	0.0213592	0.849737	0.0600396	0.621979	0.126866	0.20264	-0.491882	4.75e-09	FBgn0026753	Vha13	0.0623178	0.576052	-0.0348606	0.783405	0.0454741	0.679182	-0.0532325	0.645138	-0.645883	1.8e-12
	FBgn0027779	VhaSFD	-0.0573194	0.590645	-0.117869	0.244633	-0.118645	0.228845	-0.167737	0.0928293	-0.281263	0.000510861	FBgn0027779	VhaSFD	-0.022642	0.759221	-0.102352	0.218574	-0.0731071	0.363206	-0.216295	0.0115961	-0.237511	0.00721076
	FBgn0027785	NP15.6	0.0985855	0.510838	0.231322	0.128647	0.0455452	0.84062	0.213656	0.146776	-0.681252	7.41e-12	FBgn0027785	NP15.6	0.15287	0.184671	0.224206	0.0432206	0.141606	0.217146	0.177285	0.10239	-2.11459	1.85e-26
	FBgn0027794	CG14786	-0.10638	0.418741	-0.0380798	0.79499	-0.0946029	0.480529	0.0457271	0.738837	-0.205752	0.0645416	FBgn0027794	CG14786	-0.104072	0.402316	-0.24525	0.0457336	-0.192235	0.11537	-0.0554802	0.680047	-0.438824	0.000122603
	FBgn0028342	l(1)G0230	0.0754653	0.577555	0.106996	0.399097	0.0423983	0.741477	0.167512	0.172936	-0.57818	4.16e-11	FBgn0028342	l(1)G0230	-0.0162512	0.858731	-0.109154	0.280059	-0.034722	0.730324	-0.0757322	0.461479	-1.97486	1.3e-34
	FBgn0028662	VhaPPA1-1	-0.0126253	0.885231	-0.00699409	0.929457	-0.0383431	0.690026	-0.0099862	0.88761	-0.198359	0.0161654	FBgn0028662	VhaPPA1-1	0.00241436	0.962671	-0.0172276	0.766439	0.083091	0.415455	0.0142835	0.975694	0.097199	0.281215
	FBgn0028663	VhaM9.7-b	0.12595	0.32116	0.115102	0.371984	0.0350466	0.814015	0.00757843	0.946196	-0.00570706	0.943045	FBgn0028663	VhaM9.7-b	-0.0646236	0.547418	-0.206017	0.03726	-0.269663	0.00625869	-0.418783	2.05e-05	0.79049	1.24e-15
	FBgn0028664	VhaM9.7-c	-0.01606	0.95128	0.160382	0.320405	-0.112222	0.572483	-0.0472204	0.782265	-0.159665	0.274357	FBgn0028664	VhaM9.7-c	-0.0250007	0.821951	-0.178501	0.244296	-0.165075	0.297657	0.144234	0.293668	0.244441	0.0666068
	FBgn0028665	VhaAC39-1	0.00239202	0.948567	-0.055425	0.606537	-0.0046682	0.931233	-0.0454098	0.665574	-0.332139	7.03e-05	FBgn0028665	VhaAC39-1	-0.0961134	0.28252	-0.00786278	0.930091	-0.0368061	0.671114	-0.0876826	0.335288	-0.21889	0.0182284
	FBgn0028670	Vha100-2	0.194428	0.074841	0.312969	0.0035942	0.0492456	0.656539	0.0866809	0.441304	0.0487605	0.55656	FBgn0028670	Vha100-2	0.235365	0.00693406	0.175697	0.0428557	-0.0660097	0.420294	0.311619	0.00029948	-0.156013	0.086781
	FBgn0028671	Vha100-1	-0.0431857	0.659144	-0.0754351	0.447021	0.0245997	0.812741	-0.0542057	0.570504	-0.27874	0.000506176	FBgn0028671	Vha100-1	0.00366236	0.96448	0.0504625	0.653206	0.00706456	0.976635	-0.0837034	0.328132	0.0140079	0.929623
	FBgn0029868	CG3446	0.134586	0.243638	0.0787459	0.470551	0.0595411	0.626435	0.201489	0.0624177	-0.337522	0.000226108	FBgn0029868	CG3446	0.230492	0.0126214	0.0706011	0.45961	0.0148733	0.910774	0.111311	0.217439	-0.998633	1.8e-18
	FBgn0029888	CG3192	0.0950019	0.416271	0.0285377	0.821648	0.0306672	0.794148	0.0970974	0.39028	-0.389631	4.8e-05	FBgn0029888	CG3192	-0.0335799	0.796309	-0.150288	0.210834	0.0399219	0.722825	-0.0965971	0.487056	-1.4243	1.64e-30
	FBgn0029891	Pink1	-0.0388677	0.787088	-0.0408409	0.711423	-0.11177	0.281692	0.0396581	0.650769	-0.0342171	0.69468	FBgn0029891	Pink1	0.0421503	0.726223	0.0282724	0.833823	-0.0888981	0.220495	0.109424	0.221301	-0.254164	0.00323451
	FBgn0030605	CG5548	0.116848	0.426886	0.111426	0.438512	0.127968	0.407795	0.194649	0.136084	-0.757222	1.66e-12	FBgn0030605	CG5548	0.0863235	0.458614	-0.0577282	0.677917	0.0619212	0.567851	-0.0158311	0.95166	-2.05804	4.13e-57
	FBgn0030610	CG9065	0.111537	0.540531	-0.00673814	0.963043	-0.0257597	0.843035	0.132058	0.387316	-0.0984802	0.424112	FBgn0030610	CG9065	0.182431	0.0582993	0.0717924	0.47179	0.0613358	0.558576	0.117377	0.194651	0.691885	7.58e-07
	FBgn0030718	CG9172	0.000183664	0.958228	0.0152585	0.901411	-0.0475966	0.726665	0.101676	0.353954	-0.324461	0.000181078	FBgn0030718	CG9172	0.0928213	0.299416	0.109611	0.1889	-0.0914993	0.253117	0.161004	0.0478225	-0.166355	0.106361
	FBgn0030853	CG5703	0.0272823	0.899004	0.0543016	0.67757	0.104028	0.401964	0.170924	0.139701	-0.259506	0.00549426	FBgn0030853	CG5703	0.0752568	0.424511	0.065776	0.435668	-0.0425295	0.55665	0.107938	0.193537	-0.258366	0.00247221
	FBgn0030975	CG7349	-0.263971	0.814954	-0.486463	0.748472	0.171916	0.921308	0.522855	0.545641	1.08014	0.240307	FBgn0030975	CG7349	-1.07965	0.0665786	-0.0949685	0.917969	-0.177827	0.770267	-0.0266374	1	1.09392	0.0304196
	FBgn0031228	CG11455	-0.210324	0.103797	0.0836126	0.503612	0.0140989	0.933417	0.216158	0.0589402	-0.369111	0.000116489	FBgn0031228	CG11455	0.00763015	0.987081	-0.0585817	0.590092	-0.04731	0.672047	0.190829	0.0572685	-1.63481	2.46e-21
	FBgn0031392	AIF	-0.139237	0.326152	-0.120048	0.399706	-0.0207986	0.929089	-0.0452473	0.77114	-0.194903	0.0940065	FBgn0031392	AIF	-0.059239	0.706937	-0.124568	0.396039	0.0306924	0.773298	-0.125306	0.362545	0.350955	0.0138086
	FBgn0031436	CG3214	-0.024957	0.859183	0.0318688	0.831338	-0.0350833	0.733416	0.149874	0.212809	-0.445097	9.18e-06	FBgn0031436	CG3214	-0.00102561	0.93207	-0.0138454	0.868129	-0.172045	0.0534626	0.110976	0.202062	-1.18814	2e-13
	FBgn0031505	CG12400	-0.0462131	0.740901	-0.0845244	0.602415	-0.104338	0.525236	0.149317	0.277262	-0.390328	9.52e-05	FBgn0031505	CG12400	0.0654773	0.53895	-0.117688	0.27937	-0.059234	0.583779	0.0460088	0.602942	-0.995765	6.28e-19
	FBgn0031771	CG9140	-0.154625	0.121062	-0.163108	0.0955057	-0.185443	0.0657103	-0.135619	0.18452	0.000837988	0.986389	FBgn0031771	CG9140	0.0217152	0.869398	0.0302568	0.759924	-0.0359162	0.587911	0.153598	0.056636	-0.188516	0.0258411
	FBgn0031830	CoVb	0.0565676	0.612082	0.159156	0.233684	0.0338758	0.816012	0.226278	0.0769214	-0.58511	2.96e-11	FBgn0031830	CoVb	0.193121	0.0695296	0.0319437	0.771862	-0.129601	0.162421	0.0624138	0.515503	-1.61994	6.16e-20
	FBgn0032222	CG5037	0.0124263	0.958696	0.00263593	0.983409	0.0432366	0.792567	0.0927823	0.398939	-0.434923	1.62e-05	FBgn0032222	CG5037	0.071813	0.542373	-0.081036	0.396469	0.0780928	0.470002	0.0550319	0.593127	-1.20365	7.5e-37
	FBgn0032373	Vha100-5	-1.37021	0.989758	-0.92704	1	0.217376	1	#NAME?	0.596667	-0.951676	0.95966	FBgn0032373	Vha100-5	-0.267581	0.216777	-0.325415	0.116647	-0.580219	0.00608321	-0.338209	0.0864741	0.246749	0.17214
	FBgn0032511	CG9306	0.0181447	0.869564	-0.0527425	0.666906	-0.026891	0.833846	0.178839	0.112207	-0.375775	7.25e-05	FBgn0032511	CG9306	0.0229602	0.886965	-0.116076	0.220065	0.0101515	0.942149	0.0755791	0.398511	-1.34144	1.17e-24
	FBgn0032833	CoIV	0.0313082	0.814765	-0.0139451	0.914124	-0.00956052	0.955493	0.152697	0.218891	-0.585135	3.58e-13	FBgn0032833	CoIV	0.0533053	0.547331	0.0131167	0.839582	-0.02871	0.732655	-0.0718761	0.429521	-1.49959	8.97e-29
	FBgn0033020	CG10396	-0.445246	0.796477	0.639034	0.513041	-0.387684	0.836297	0.518698	0.588256	0.894659	0.257129	FBgn0033020	CG10396	-0.765113	0.992712	-1.21548	0.771675	-0.475528	1	1.49209	0.40391	-0.632856	0.717476
	FBgn0033274	CG14757	-0.235316	0.128442	-0.567157	0.000415621	-0.105422	0.499367	-0.63933	8.65e-05	-0.359205	0.000923468	FBgn0033274	CG14757	-0.0388804	0.55971	-0.449439	1.05e-07	-0.224803	0.006124	-0.57027	1.38e-11	0.406603	1.06e-05
	FBgn0033465	Etf-QO	0.221772	0.139045	0.00363634	0.980512	-0.226839	0.123213	0.24737	0.0749508	0.369174	0.000187805	FBgn0033465	Etf-QO	0.114327	0.260634	-0.0986104	0.290428	-0.241028	0.0100183	0.0248423	0.748925	-0.0893985	0.395261
	FBgn0033523	CG12895	-0.00571233	0.964505	-0.0954546	0.638248	0.0637861	0.680487	-0.11219	0.507122	-0.0941222	0.548561	FBgn0033523	CG12895	0.0395876	0.923217	-0.386239	0.00398416	-0.106179	0.376625	-0.17266	0.179851	0.254646	0.0590699
	FBgn0033570	CG7712	0.0432845	0.766837	0.170735	0.17602	0.169745	0.175559	0.161178	0.167779	-0.312617	0.00135148	FBgn0033570	CG7712	0.109063	0.310796	-0.0623946	0.413545	0.067668	0.544034	0.115566	0.236697	-0.659975	2.96e-06
	FBgn0033885	DJ-1alpha	-0.0519855	0.791272	0.541958	0.00579474	0.163531	0.419008	0.121912	0.532071	1.11582	0.0004949	FBgn0033885	DJ-1alpha	0.815292	0.172006	0.782639	0.201128	0.805192	0.162972	0.253747	0.81014	0.714466	0.204781
	FBgn0033961	CG12859	0.0932153	0.629169	0.106212	0.567003	0.135892	0.497881	0.122907	0.495438	-0.556637	4.35e-06	FBgn0033961	CG12859	0.0845042	0.477469	-0.0172119	0.917906	-0.0554455	0.636931	0.0290696	0.748523	-1.61386	4.24e-14
	FBgn0034245	CG14482	0.0931192	0.515045	-0.0161644	0.924283	-0.00316742	0.986036	0.0650131	0.656149	-0.678295	1.48e-11	FBgn0034245	CG14482	0.15985	0.162578	-0.197341	0.0726315	-0.247762	0.0210791	-0.0492761	0.67881	-1.47391	2.76e-33
	FBgn0034645	CG10320	0.0468104	0.708429	0.167722	0.181245	0.156083	0.210339	0.133762	0.25102	-0.543008	1.62e-07	FBgn0034645	CG10320	0.00468159	0.958179	-0.162901	0.281219	-0.202176	0.15193	0.0586309	0.603989	-1.06088	3.86e-11
	FBgn0034877	levy	0.00981862	0.973158	-0.0174234	0.912249	0.0421359	0.740076	0.172939	0.164596	-0.535094	1.14e-10	FBgn0034877	levy	0.155097	0.166159	0.11777	0.290872	0.0243239	0.869855	0.236102	0.0269543	-1.31075	5.59e-42
	FBgn0034938	CG3803	0.244781	0.166887	0.185908	0.346956	0.164118	0.424906	0.244247	0.2006	-0.281601	0.0808552	FBgn0034938	CG3803	-0.0124924	1	-0.117767	0.605394	0.113775	0.553107	0.123066	0.5039	-0.0591366	0.764514
	FBgn0035046	NDUFA8	0.137594	0.26099	0.14062	0.269868	0.112287	0.324542	0.241414	0.0454722	-0.650805	1.69e-10	FBgn0035046	NDUFA8	0.113184	0.295887	-0.0771457	0.469999	-0.0180607	0.885504	0.0553426	0.58982	-1.96274	3.34e-72
	FBgn0035521	VhaM9.7-a	-0.0205215	0.936513	-0.0885421	0.468114	-0.0721172	0.548045	-0.0525803	0.683804	-0.644167	4.44e-10	FBgn0035521	VhaM9.7-a	0.384722	0.140088	0.197546	0.518091	0.016499	1	0.032206	1	-0.404708	0.041176
	FBgn0035600	CG4769	0.0966382	0.351397	0.0866512	0.384717	0.0234899	0.804953	0.112271	0.240774	-0.469415	8.72e-09	FBgn0035600	CG4769	0.215153	0.0165618	0.0724487	0.425522	0.0295702	0.810395	0.145806	0.0848521	-1.27491	3.24e-37
	FBgn0036568	ms(3)72Dt	#NAME?	0.989339	1.35056	0.90784	0.427	1	1.92795	0.539652	0.475159	1	FBgn0036568	ms(3)72Dt	0.0224646	1	-0.79485	1	-0.90635	1	1.41942	0.632466	-1.21527	0.756437
	FBgn0036728	CG7580	0.0423279	0.756211	0.061692	0.644999	0.125624	0.344103	0.160939	0.190923	-0.545899	2.05e-09	FBgn0036728	CG7580	0.187551	0.0438448	0.0103397	0.988835	-0.058211	0.415739	0.0859402	0.33818	-1.70034	8.01e-40
	FBgn0037001	CG6020	-0.0446286	0.71304	0.0587027	0.620449	-0.0882939	0.508636	0.136627	0.242634	-0.329979	4.77e-05	FBgn0037001	CG6020	-0.0726715	0.374197	0.101747	0.21759	0.0712255	0.401829	0.0634344	0.428376	-1.15235	2.09e-41
	FBgn0037232	CG9791	-0.265739	0.163248	0.0849122	0.646193	0.171044	0.426873	-0.104079	0.612011	-0.332567	0.0215744	FBgn0037232	CG9791	-0.224207	0.13615	-0.0924484	0.510582	-0.10936	0.455489	0.0348438	0.983359	-0.299265	0.0451014
	FBgn0037873	SdhC	-0.0756933	0.532125	-0.0615637	0.619053	-0.0536175	0.668697	0.051191	0.632686	-0.350858	0.000103975	FBgn0037873	SdhC	0.268141	0.00209661	0.0834595	0.326956	-0.0586676	0.481974	0.272994	0.00103081	-0.98594	1.88e-11
	FBgn0038224	CG3321	0.148672	0.255179	0.0522645	0.674647	0.0749304	0.537768	0.236136	0.0526862	-0.454845	1.68e-07	FBgn0038224	CG3321	0.19662	0.0482795	0.087467	0.368313	0.0794996	0.435735	0.256457	0.00562153	-1.241	4.02e-22
	FBgn0038271	CG3731	0.0341464	0.792806	0.019462	0.847319	-0.0557259	0.665989	0.159106	0.157424	-0.440662	2.65e-08	FBgn0038271	CG3731	0.098499	0.263951	-0.0296162	0.701897	-0.00328404	0.917853	0.0955968	0.231683	-1.45995	1.1e-33
	FBgn0038613	Vha100-4	-1.81886	0.686831	-0.307714	1	#NAME?	0.394182	-0.0510027	1	0.414513	1	FBgn0038613	Vha100-4	0.32417	0.645195	-0.0784875	0.994758	-0.597889	0.368308	-0.700389	0.309198	3.02932	1.26e-06
	FBgn0039058	VhaAC39-2	-1.56293	0.655628	-0.400057	1	-0.280309	1	-0.170931	1	-0.445509	0.944122	FBgn0039058	VhaAC39-2	-0.111231	1	-0.743323	0.845179	-1.96418	0.479346	0.443085	0.963827	0.214818	1
	FBgn0039331	CG11913	-1.12168	0.391639	-1.97157	0.215671	#NAME?	0.025483	-1.52357	0.232648	3.28034	0.0496566	FBgn0039331	CG11913	0.0422706	1	0.295253	1	-0.604777	1	-0.518825	1	-0.425863	1
	FBgn0039360	CLS	0.0197697	0.936084	0.130531	0.519436	0.385	0.0329908	0.129175	0.466694	-0.344986	0.0143362	FBgn0039360	CLS	0.0470529	0.788981	0.0267551	0.90895	0.234713	0.171314	-0.000167668	0.981752	-1.01324	2.29e-13
	FBgn0039651	CG14508	0.396087	0.57702	-0.552651	0.611369	0.0942507	1	0.719815	0.276987	0.598413	0.433424	FBgn0039651	CG14508	0.016373	1	1.355	0.921664	1.25834	0.981616	2.34218	0.466779	-1.09679	0.7574
	FBgn0039689	CG7598	0.0709757	0.69876	0.128899	0.433583	0.168958	0.335493	0.180943	0.237309	0.0601435	0.681554	FBgn0039689	CG7598	-0.12128	0.410808	-0.118001	0.428641	0.0798687	0.511271	0.0233498	0.791671	-0.320984	0.00500798
	FBgn0039697	CG7834	0.259603	0.214061	0.306923	0.138104	0.0100159	0.937461	0.511013	0.0123772	0.156558	0.0598996	FBgn0039697	CG7834	0.0918253	0.248891	-0.0805802	0.396081	-0.0692746	0.453029	0.178328	0.0310886	-0.0587001	0.525328
	FBgn0039802	dj-1beta	-0.0228594	0.851425	0.0978481	0.423805	-0.0759553	0.553378	0.201607	0.0858371	-0.18518	0.0780323	FBgn0039802	dj-1beta	0.19722	0.0335697	0.06568	0.434432	0.0120132	0.849962	0.239961	0.00854477	-0.174822	0.0682331
	FBgn0039830	CG1746	0.0901618	0.320377	0.0304405	0.712816	-0.0134321	0.910422	0.116462	0.186808	-0.722666	8.63e-21	FBgn0039830	CG1746	0.175282	0.0348237	0.0262137	0.726615	-0.056311	0.501245	0.085155	0.26795	-2.68101	1.1e-34
	FBgn0039909	CG1970	-0.0805482	0.407577	-0.0655884	0.521133	-0.117195	0.261614	-0.012721	0.926864	-0.334437	3.64e-05	FBgn0039909	CG1970	0.0416431	0.724329	0.029837	0.746968	-0.08286	0.271378	-0.00878694	0.90348	-0.572835	1.1e-11
	FBgn0040377	Vha36-3	0.140986	0.520695	0.117975	0.547806	0.14157	0.48349	0.419147	0.0145779	0.321831	0.047812	FBgn0040377	Vha36-3	0.332369	0.00505344	0.0226274	0.925405	0.0854613	0.546969	0.154922	0.203651	0.147761	0.215198
	FBgn0040529	CG9603	0.0456437	0.656579	0.00266657	0.972772	0.0358567	0.727448	0.151054	0.122267	-0.465411	3e-08	FBgn0040529	CG9603	-0.018189	0.887458	-0.0280964	0.834132	-0.114089	0.273472	0.0284848	0.723621	0.037938	0.668108
	FBgn0040705	CG15434	NA	NA	NA	NA	NA	NA	Inf	0.211267	1.51329	0.754339	FBgn0040705	CG15434	0.682765	1.96e-05	0.174443	0.367426	-0.160281	0.221571	0.377825	0.0196227	-2.15078	1.56e-31
	FBgn0040773	CoVIIc	0.0475007	0.722038	0.0813535	0.569237	-0.0122635	0.905729	0.0870133	0.511859	-0.605353	8.95e-12	FBgn0040773	CoVIIc	0.236835	0.0111909	0.0061703	0.993947	-0.118555	0.147123	0.066057	0.462063	-1.32652	3.59e-18
	FBgn0047038	CG6463	0.201184	0.174941	0.124379	0.390799	-0.0376984	0.808247	0.232391	0.0892755	-0.385825	0.000210121	FBgn0047038	CG6463	0.129172	0.195956	-0.0360508	0.709081	-0.0870856	0.371564	-0.03056	0.775557	-1.22501	7.84e-12
	FBgn0050354	CG30354	-1.33167	0.305132	-0.704202	0.632307	-0.782295	0.619787	-1.46125	0.276149	0.139107	0.981641	FBgn0050354	CG30354	0.0981662	1	-0.265662	0.942045	0.264223	1	-0.126359	1	0.477198	0.714166
	FBgn0051648	CG31648	-0.0565225	0.840681	0.105279	0.779592	-0.222065	0.389375	0.0079309	1	-0.18627	0.481993	FBgn0051648	CG31648	0.0179731	0.920979	-0.0226917	0.998662	-0.0766322	0.790558	-0.144693	0.602033	0.0478351	0.762317
	FBgn0052230	CG32230	0.13138	0.44809	0.0754741	0.652213	-0.101402	0.567525	0.159346	0.326854	-0.632443	3.85e-13	FBgn0052230	CG32230	0.314902	0.00288036	-0.026652	0.800151	-0.136363	0.194141	0.0415669	0.585231	-2.16877	3.37e-27
	FBgn0052649	CG32649	0.0213576	0.926428	-0.0406556	0.767631	0.11817	0.438397	-0.00440976	0.996293	0.0697469	0.584553	FBgn0052649	CG32649	0.0359494	0.687152	-0.116533	0.270615	0.0691404	0.522102	-0.0565746	0.593305	-0.307861	0.00255523
	FBgn0085468	CG34439	0.0932059	0.564299	0.106889	0.477442	0.0708363	0.690084	0.336296	0.0202969	-0.514366	1.62e-05	FBgn0085468	CG34439	0.262992	0.0365474	-0.0273077	0.74921	-0.0401167	0.726317	0.289294	0.0138987	-1.09696	2.09e-15
	FBgn0086907	Cyt-c-d	-1.18814	0.344925	-1.36587	0.322103	-0.145413	1	-1.27937	0.311388	-0.231228	0.904743	FBgn0086907	Cyt-c-d	-0.400755	0.989812	-1.42779	0.465285	-0.61635	0.832968	0.66831	0.549928	-1.60515	0.15866
	FBgn0250814	CG4169	0.0338063	0.811914	0.0593876	0.614809	-0.00494943	0.987093	0.241962	0.0341944	-0.354322	8.93e-06	FBgn0250814	CG4169	0.0911236	0.317305	0.173647	0.0364603	-0.00216166	0.895739	0.25731	0.00178099	-1.21908	1.09e-28
	FBgn0260008	Ucrh	0.295533	0.0651136	-0.135184	0.390052	-0.0648941	0.639909	0.172174	0.259643	-0.515035	1.75e-07	FBgn0260008	Ucrh	0.200999	0.117844	-0.193559	0.116674	-0.219454	0.077179	0.0445438	0.619364	-2.20567	7.13e-20
	FBgn0261439	SdhA	-0.044255	0.604031	-0.122749	0.213564	-0.0937559	0.356811	-0.126717	0.188102	-0.2386	0.00309049	FBgn0261439	SdhA	0.233113	0.0101296	0.291722	0.000771449	0.103233	0.31615	0.393794	4.56e-06	-1.23189	2.21e-47
	FBgn0262467	Scox	0.0242889	0.881035	0.193674	0.209245	0.154524	0.303133	0.238906	0.098705	0.00864698	1	FBgn0262467	Scox	0.0435553	0.705718	-0.103076	0.447652	-0.0213946	0.889368	-0.0475598	0.705579	0.649586	2.54e-06
	FBgn0262511	Vha44	-0.00704452	0.982403	-0.0841411	0.416346	-0.130262	0.22679	-0.256117	0.010888	-0.308263	0.000151971	FBgn0262511	Vha44	0.206214	0.025187	0.146208	0.10698	-0.0586024	0.496848	-0.00762155	0.923763	-0.605361	5.41e-12
	FBgn0262512	Vha14-1	0.056111	0.635922	-0.138372	0.256154	-0.0499914	0.69362	0.024189	0.779326	-0.523295	3.14e-08	FBgn0262512	Vha14-1	-0.0636988	0.56658	-0.0972877	0.381716	-0.0548617	0.651421	-0.0963769	0.387008	-0.190626	0.0629188
	FBgn0262515	VhaAC45	-0.0414262	0.698705	-0.00468986	0.921597	-0.04832	0.627056	0.0313897	0.790776	-0.0432365	0.598782	FBgn0262515	VhaAC45	0.039694	0.669788	-0.000224659	0.987094	-0.0284326	0.713418	-0.082614	0.338262	0.150171	0.0869806
	FBgn0262736	Vha16-1	0.053275	0.5786	0.0349509	0.70795	0.0155123	0.873335	-0.162633	0.0743891	-0.182304	0.0167814	FBgn0262736	Vha16-1	0.00272724	0.930948	0.00123658	0.99804	-0.064333	0.400163	-0.0583907	0.461822	-0.163152	0.0475686
	FBgn0262842	CG43206	-1.94062	0.543716	-1.42947	0.634654	-0.276232	1	-2.86027	0.337449	-0.512727	0.942266	FBgn0262842	CG43206	-1.83124	0.322046	-2.64856	0.214512	-0.721206	0.704771	-1.6561	0.3487	-1.79138	0.0343815
	FBgn0262952	mt:ND4	0.034972	0.805151	-0.176904	0.297534	-0.231701	0.155493	-0.0968788	0.62465	-0.25314	0.1483	FBgn0262952	mt:ND4	0.0481385	0.795572	-0.529325	3.19e-05	-0.493451	0.00012333	-0.429848	0.000969603	-2.59029	5.13e-87
	FBgn0263598	Vha68-2	-0.0330531	0.695036	-0.0300299	0.763091	-0.139681	0.144908	-0.0800998	0.408109	0.0479089	0.563951	FBgn0263598	Vha68-2	-0.032306	0.750019	-0.0107441	0.917992	0.0486195	0.562689	-8.06e-05	0.98385	0.127275	0.148086
	FBgn0265262	Vha68-1	-0.0551397	0.629965	-0.211375	0.0335139	-0.105896	0.29582	-0.16166	0.106638	-0.795121	6.27e-23	FBgn0265262	Vha68-1	0.130003	0.151701	-0.021094	0.794926	-0.0319088	0.674127	-0.00591705	0.92586	-0.940375	1.66e-25
