# Supplementary material for: Epigenetic drift of H3K27me3 in aging links glycolysis to healthy longevity in Drosophila
Source: eLife. 2018 May 29;7:e35368. doi: 10.7554/eLife.35368 (PMC5991832; doi:10.7554/eLife.35368)
Supplement: Supplementary file 5. [file elife-35368-supp5.xls]

## Sheet: 工作表1
ChIP-qPCR primers
	forward primer	reverse primer
Tpi-a	5'-GTCCTGATGCGATGTATGCCT-3'	5'-GCAGTGACTCCAACCATCTGAT-3'
Tpi-b	5'-ACCACAATAGAAATGCCGCCT-3'	5'-GCTTTTAGTACCTCCGCCGT-3'
Tpi-c	5'-GCCTCCAGTCATCGAGTTACC-3'	5'-ACTTTCGGCTCATGTTGTTGC-3'
Tpi-d	5'-AAGGACTGGAAGAACGTGGT-3'	5'-TCCTTGGAGATGTTGTCGCT-3'
Pgi-a	5'-GACACCTGACAGCCCTGAAC-3'	5'-TCCTAGATCGTCTGCACCGG-3'
Pgi-b	5'-GACATTGAAAGGTGCTCGCG-3'	5'-GCTTAGGCGTCGGGTAGTTC-3'
Pgi-c	5'-GGGCAAGGACCTGAACATCAA-3'	5'-AAAGTGAAAGTGGGCAAAGCG-3'
Pgi-d	5'-AAAAACTTTCACCACCCAGGAGA-3'	5'-CACTAGGGTCCATTGATGGTTCA-3'
RT-qPCR primers
	forward primer	reverse primer
rp49	5'-CCGCTTCAAGGGACAGTATCTG-3'	5'-ATCTCGCCGCAGTAAACGC-3'
Pgi	5'-TCATTGTCGCCTCAAAAACTTTC-3'	5'-GAATTCGGTGACCTTTTCCTTGT-3'
Tpi	5'-CTACGCCCAGAAGATCAAGGACT-3'	5'-CACCTCCTTGGAGATGTTGTCG-3'
trangenes primers
	forward primer	reverse primer
Tpi-1	5'-AATTGCGATCGGATGACACG-3'	5'-GTTGTTGCTGTTGCTGTCGG-3'
Tpi-2	5'-ATGAGCCGAAAGTTCTGCG-3'	5'-TGATGCTTGAGATCGCGTTG-3'
Tpi-3	5'-ATAGATGGCTTCCTGGTCGG-3'	5'-CGTTCTTAGGCCCTTTGGTC-3'
Pgi-1	5'-CTATCCGTTTCTGGCCGTTG-3'	5'-GTCGTAGTACTCCTGCAGCT-3'
Pgi-2	5'-ATGGCCGGCCCACTTCCTC-3'	5'-CAATTCCCTTGTTGTTGCGC-3'
Pgi-3	5'-TGGGACATCAACTCGTTCGA-3'	5'-GGCCACCCGTGTAATGATTC-3'
